# Supplementary material for: Region-Restrict Astrocytes Exhibit Heterogeneous Susceptibility to Neuronal Reprogramming
Source: PubMed Central journal article supplement — Stem Cell Reports. 2019 Jan 31;12(2):290–304. doi: 10.1016/j.stemcr.2018.12.017 (PMC6373495; doi:10.1016/j.stemcr.2018.12.017), 2019-01-31
Supplement: mmc2.pdf [file mmc2.pdf]

# Region-Restrict Astrocytes Exhibit Heterogeneous Susceptibility to Neuronal Reprogramming

Xin Hu,<sup>1,2,4</sup> Shangyao Qin,<sup>1,4</sup> Xiao Huang,<sup>1,4</sup> Yimin Yuan,<sup>1</sup> Zijian Tan,<sup>1</sup> Yakun Gu,<sup>1</sup> Xueyan Cheng,<sup>1</sup> Dan Wang,<sup>1</sup> Xiao-Feng Lian,<sup>3</sup> Cheng He,<sup>1,\*</sup> and Zhida Su<sup>1,\*</sup>

<sup>1</sup>Institute of Neuroscience, Key Laboratory of Molecular Neurobiology of Ministry of Education and the Collaborative Innovation Center for Brain Science, Second Military Medical University, Shanghai 200433, China

<sup>2</sup>Department of Neurological Surgery, Xixi Hospital of Hangzhou, Hangzhou 200233 China

<sup>3</sup>Department of Orthopedics, Shanghai Jiao Tong University Affiliated Sixth People's Hospital, Shanghai 310009, China

<sup>4</sup>Co-first author

\*Correspondence: [chenghe@smmu.edu.cn](mailto:chenghe@smmu.edu.cn) (C.H.), [suzhida@smmu.edu.cn](mailto:suzhida@smmu.edu.cn) (Z.S.)

<https://doi.org/10.1016/j.stemcr.2018.12.017>

## SUMMARY

The adult CNS has poor ability to replace degenerated neurons following injury or disease. Recently, direct reprogramming of astrocytes into induced neurons has been proposed as an innovative strategy toward CNS repair. As a cell population that shows high diversity on physiological properties and functions depending on their spatiotemporal distribution, however, whether the astrocyte heterogeneity affect neuronal reprogramming is not clear. Here, we show that astrocytes derived from cortex, cerebellum, and spinal cord exhibit biological heterogeneity and possess distinct susceptibility to transcription factor-induced neuronal reprogramming. The heterogeneous expression level of NOTCH1 signaling in the different CNS regions-derived astrocytes is shown to be responsible for the neuronal reprogramming diversity. Taken together, our findings demonstrate that region-restricted astrocytes reveal different intrinsic limitation of the response to neuronal reprogramming.

## INTRODUCTION

Astrocytes, the most abundant cells in mammalian CNS, play crucial roles in nearly all aspects of CNS function from regulating the blood flow and modulation of synaptic transmission to participation in the maintenance of blood-brain barrier (Matyash and Kettenmann, 2010; Oberheim et al., 2012; Okuda, 2018). Historically, astrocytes were regarded as homogeneous cells defined by their star-shaped morphology, and then they were divided into many types, including protoplasmic and fibrous astrocytes, by their different appearances (Chaboub and Deneen, 2012; Molofsky et al., 2012; Zhang and Barres, 2010). In the last decades, however, it was appreciated that astrocytes were much more heterogeneous in their morphological and functional properties than previously thought, which contributes to the identification of accurate subpopulations of astrocytes in the CNS (Buosi et al., 2018; Denis-Donini et al., 1984; Matyash and Kettenmann, 2010; Okuda, 2018). Based on their spatiotemporal distribution and activation level, astrocytes have been identified as a complex colony with heterogeneity on morphology, gene expression, function, and many other aspects in physiological or pathological conditions (Hu et al., 2016). For example, Emsley and Macklis (2006) depicted nine different classes of astrocytes which displayed significant dissimilarities in morphology, density, and proliferation, depending on their various distribution regions across the CNS. The heterogeneous astrocytes derived from spatiotemporal location enable us to speculate that they may fulfill specific

roles for diverse neuron populations, which is indispensable for the maintenance of normal neurological activity (Ben Haim and Rowitch, 2017; Buosi et al., 2018). Furthermore, it was reported that astrocytes at different developmental stage exerted distinct effects on neuronal growth, suggesting that astrocytes also process dynamic functions and properties in term of their temporal distribution (Ben Haim and Rowitch, 2017; Buosi et al., 2018).

The irreversible loss of neurons is an important pathological feature of CNS injury and disease, resulting in persistent neurological disability. Due to the limited intrinsic neurogenic capacity and the presence of the hostile environment at the lesion site, the injured CNS resulted from wound or disease cannot self-repair and self-restore to an original degree (Hashemian et al., 2015). Since the generation of induced pluripotent stem cells (iPSCs) by Takahashi and Yamanaka (2006), cell reprogramming has attracted the most attention as a potential therapeutic strategy for CNS injury and disease. Because of the ubiquitous distribution in the CNS and the close lineage to neuron, astrocytes have been selected as an ideal candidate for neuronal reprogramming. Currently, astrocytes have been successfully reprogrammed into different types of functional mature neurons using defined transcription factors *in vitro* (Berninger et al., 2007; Heinrich et al., 2010). For example, Gotz and colleagues showed that the early postnatal cortical astrocytes in culture could be induced to adopt a neuronal fate after forced expression of proneural gene *NGN2* (neurogenin-2) and *ASCL1* (achaete-scute homolog 1 or achaete-scute complex homolog 1) (Berninger et al., 2007). Importantly, some

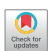

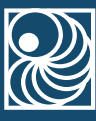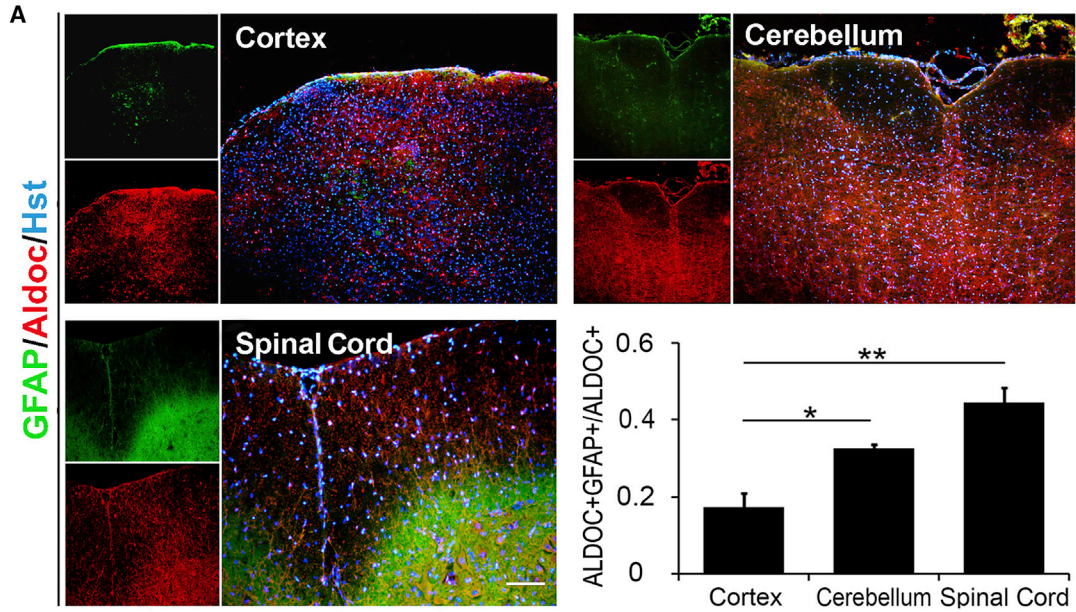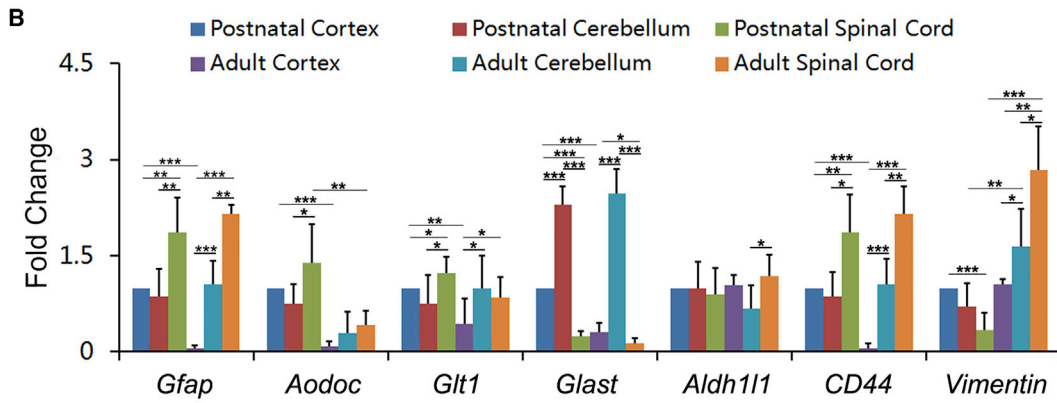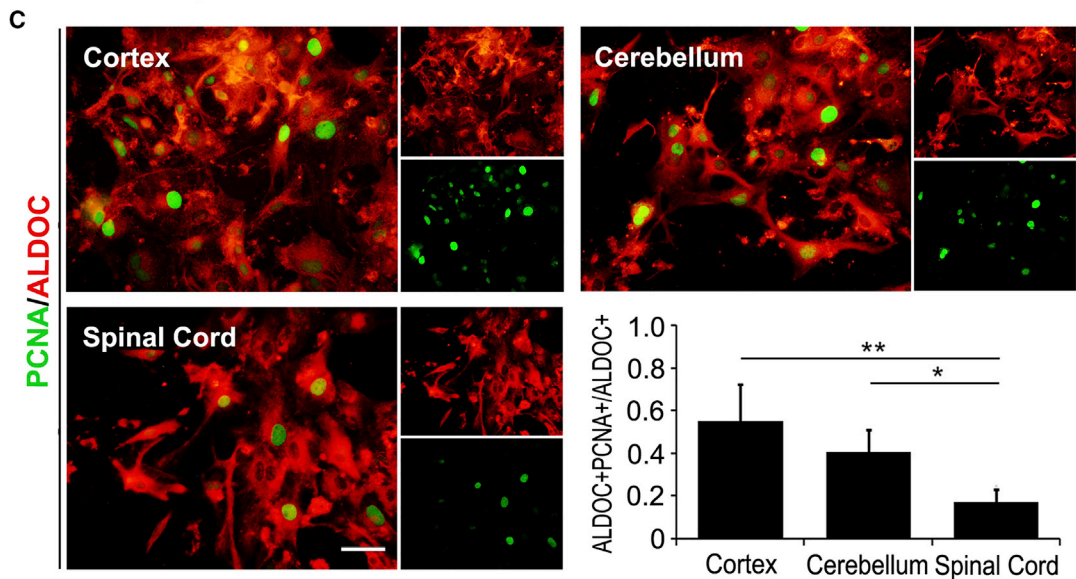

(legend on next page)

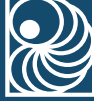

studies have further demonstrated that the functional neurons can also be directly generated *in vivo* from resident astrocytes (Guo et al., 2014; Niu et al., 2013; Su et al., 2014a). In adult mammal brain and spinal cord, transcription factor SOX2, NEUROD1 or ASCL1 was sufficient to convert astrocytes into mature neurons (Guo et al., 2014; Niu et al., 2013; Su et al., 2014a). In spite of these advancements, little is known about the extracellular and intracellular factors that regulate the direct lineage switching of astrocytes to induced neurons. It was reported that the local microenvironments including injury conditions have significant influence on the efficacy of reprogramming and subsequent survival of newly generated neurons in the adult rodent brain (Grande et al., 2013). However, whether the neuronal reprogramming is affected by the heterogeneity of astrocytes remains an open question.

To tackle this issue, astrocytes derived from different CNS regions, including cortex, cerebellum, and spinal cord, were used for direct lineage reprogramming. Here, we found that region-restrict astrocytes exhibit marked biological heterogeneity and showed distinct susceptibility to transcription factor-induced neuronal reprogramming. Of note, heterogeneous expression level of NOTCH1 signaling was identified in the different CNS regions-derived astrocytes, which is responsible for the neuronal reprogramming diversity. Taken together, our findings suggest that region-restricted astrocytes reveal diverse intrinsic limitation of the response to neuronal reprogramming. This proof-of-principle study will significantly expand our understanding of the regulation of neuronal reprogramming.

## RESULTS

### Region-Restrict Astrocytes Exhibit Heterogeneous Gene Expression and Proliferation Activity

Traditionally, protoplasmic and fibrous astrocytes have been identified in gray matter and white matter of the CNS, respectively. However, in addition to the differences between protoplasmic and fibrous astrocytes, conspicuous molecular heterogeneity has been described within the astrocytes of different CNS regions (Hu et al., 2016). Glial fibrillary acidic protein (GFAP) has been used as a regular

marker to identify astrocytes for several decades. However, there is growing evidence that the GFAP-labeled cells cannot represent all the astrocytes in the CNS (Hu et al., 2016). GFAP is mainly expressed in mature fibrous astrocytes and reactive astrocytes. To investigate the molecular heterogeneity of astrocytes from different CNS regions, immunohistochemistry was performed using antibodies against GFAP and Aldoc (aldolase C, a universal astrocyte marker) (Bachoo et al., 2004; Tsai et al., 2012). Figure 1A shows that Aldoc<sup>+</sup> cells dispersed consistently across the cerebral cortex, cerebellum, and spinal cord, whereas GFAP<sup>+</sup> cells tended to be enriched in spinal cord compared with the other two brain regions. Quantitative analysis indicated that the ratio of GFAP<sup>+</sup>/Aldoc<sup>+</sup> cells to Aldoc<sup>+</sup> cells in the cerebral cortex, cerebellum, and spinal cord was 17.3%, 32.5%, and 44.5%, respectively (Figure 1A). To further demonstrate the molecular heterogeneity of region-restrict astrocytes, we isolated and cultured postnatal astrocytes from the cerebral cortex, cerebellum, and spinal cord. Using a protocol we successfully established recently (Sun et al., 2017), correspondingly, adult astrocytes were also prepared from the three different regions (Figure S1A). Then, the expression level of astrocyte characteristic genes, including *Gfap*, *Aldoc*, *Glt1*, *Glast*, *Aldh1l1*, *CD44*, and *Vimentin*, was detected in these postnatal or adult astrocytes by real-time qPCR. As shown in Figure 1B, the astrocytes of different origins exhibited distinct expression patterns in the selected genes, suggestive of their molecular heterogeneity.

In addition, the proliferative activity of postnatal astrocytes was assessed in culture by staining for PCNA, a nuclear protein expressed at high levels in proliferating cells. Immunocytochemical analysis revealed that cortex-derived astrocytes possessed a high proliferation rate, while spinal cord-derived astrocytes showed a low proliferation rate (Figure 1C). There was more than 55% proliferating astrocytes in the cortex but only less than 20% in spinal cord (Figure 1C). Meanwhile, we also analyzed the proliferative activity in cultured astrocytes from adult mice. Similarly, cortex-derived astrocytes showed a higher proliferation rate than cerebellum- or spinal cord-derived astrocytes (Figure S1B). Taken together, the region-restrict astrocytes exhibit significant heterogeneities in characteristic molecule expression and proliferative activity.

### Figure 1. Astrocyte Heterogeneity in Gene Expression and Proliferation

(A) Immunohistochemical analysis of GFAP and Aldoc in astrocytes from adult mouse cortex, cerebellum, and spinal cord (n = 3; cells = 1,500–2,000 for each condition).

(B) The heterogeneous gene expression in cortex-, cerebellum-, and spinal cord-derived cultured postnatal or adult astrocytes determined by real-time PCR (a representative result from three independent experiments).

(C) The heterogeneous cell proliferation of regional postnatal astrocytes (n = 3; cells = 1,000–1,500 for each condition).

\*p < 0.05, \*\*p < 0.01, \*\*\*p < 0.001 by ANOVA Tukey's *post hoc* test. Scale bars, 100 μm (A) and 50 μm (C).



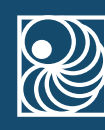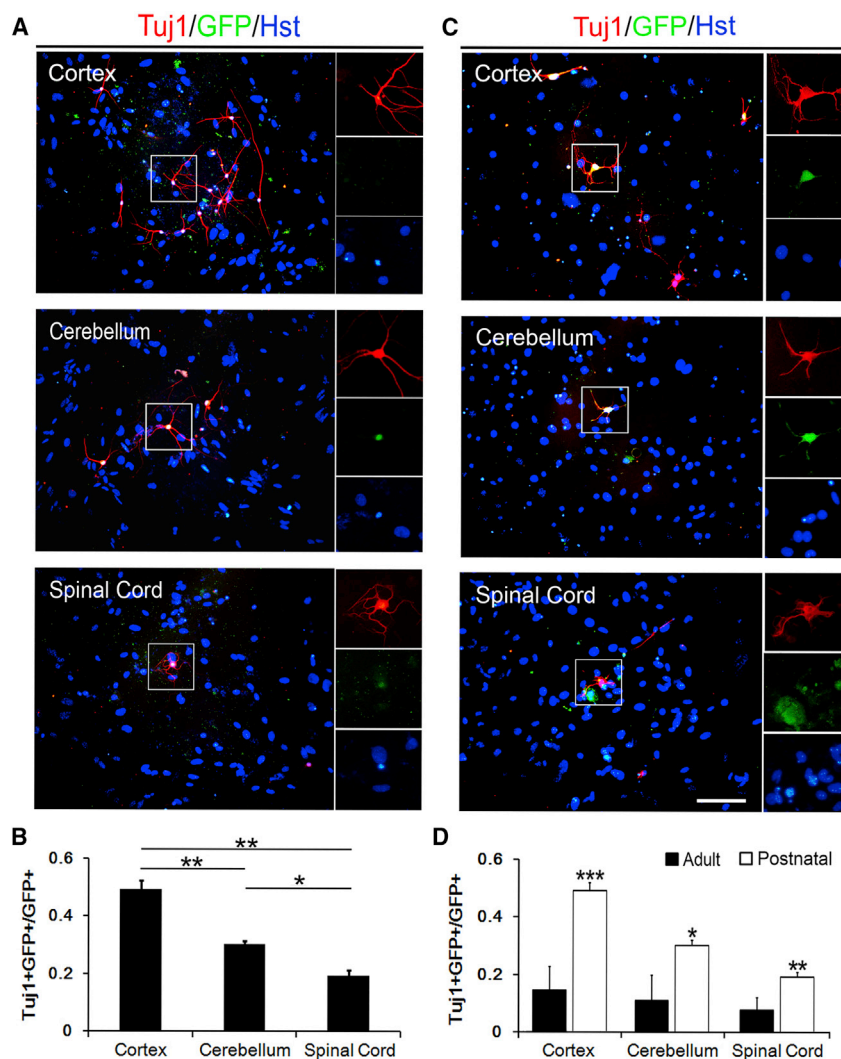

**Figure 2. NGN2-Induced Neuronal Reprogramming Efficiency of Postnatal and Adult Astrocytes**

(A) Representative pictures of NGN2-induced neurons from postnatal astrocytes by staining with Tuj1 at 12 dpi.

(B) NGN2-induced neuronal reprogramming efficiency of postnatal astrocytes ( $n = 3$ ; cells = 900–1,500 for each condition).

(C) Representative pictures of NGN2-induced neurons from adult astrocytes by staining with Tuj1 at 12 dpi.

(D) Comparing NGN2-induced neuronal reprogramming efficiency of adult astrocytes compared with that of postnatal astrocytes ( $n = 3$ ; cells = 700–1,500 for each condition). \* $p < 0.05$ , \*\* $p < 0.01$ , \*\*\* $p < 0.001$  by ANOVA Tukey's *post hoc* test. Scale bar, 100  $\mu\text{m}$ .

### Region-Restrict Astrocytes Possess Distinct Susceptibility to Neuronal Reprogramming

Astrocytes can be converted to neuron-like cells by forced expression of transcription factors *in vitro* (Berninger et al., 2007; Sun et al., 2017). It was reported that a single transcription factor, such as NGN2 or ASCL1, is sufficient to reprogram astrocytes into neurons (Berninger et al., 2007). To investigate the effects of the heterogeneity of region-restrict astrocytes on the transcription factor-mediated neuronal reprogramming, a lentiviral delivery system in which gene expression was under the control of a human GFAP promoter was used to specifically target astrocytes. Twelve days after infected with lentivirus expressing NGN2, both postnatal and adult astrocytes were induced to obtain a neuron-like morphology (Figures 2A and 2C). Immunostaining showed that these NGN2-induced cells were positive for Tuj1, a pan-neuronal marker (Figures 2A and 2C). For the postnatal astrocytes from

different regions, the reprogramming efficiency was estimated at about 50% for cortex, 30% for cerebellum, and 20% for spinal cord (Figure 2B). The similar heterogeneity of the NGN2-mediated reprogramming efficiency was observed in adult astrocytes cultured from cortex, cerebellum, and spinal cord (Figure 2D). As shown in Figure 2D, strikingly, the neuronal induction efficiency of adult astrocytes from all these three regions was much lower than that of postnatal astrocytes. Therefore, astrocytes from spinal cord, especially those from adult animals, tend to be more difficult to be reprogrammed into neurons by NGN2. Of note, terminal deoxynucleotidyl transferase dUTP nick-end labeling staining showed no significant difference in the apoptosis of region-restrict astrocytes-derived immature neurons, suggesting that the heterogeneity of the NGN2-mediated reprogramming efficiency did not result from heterogeneous cell apoptosis (Figure S2).

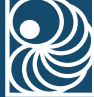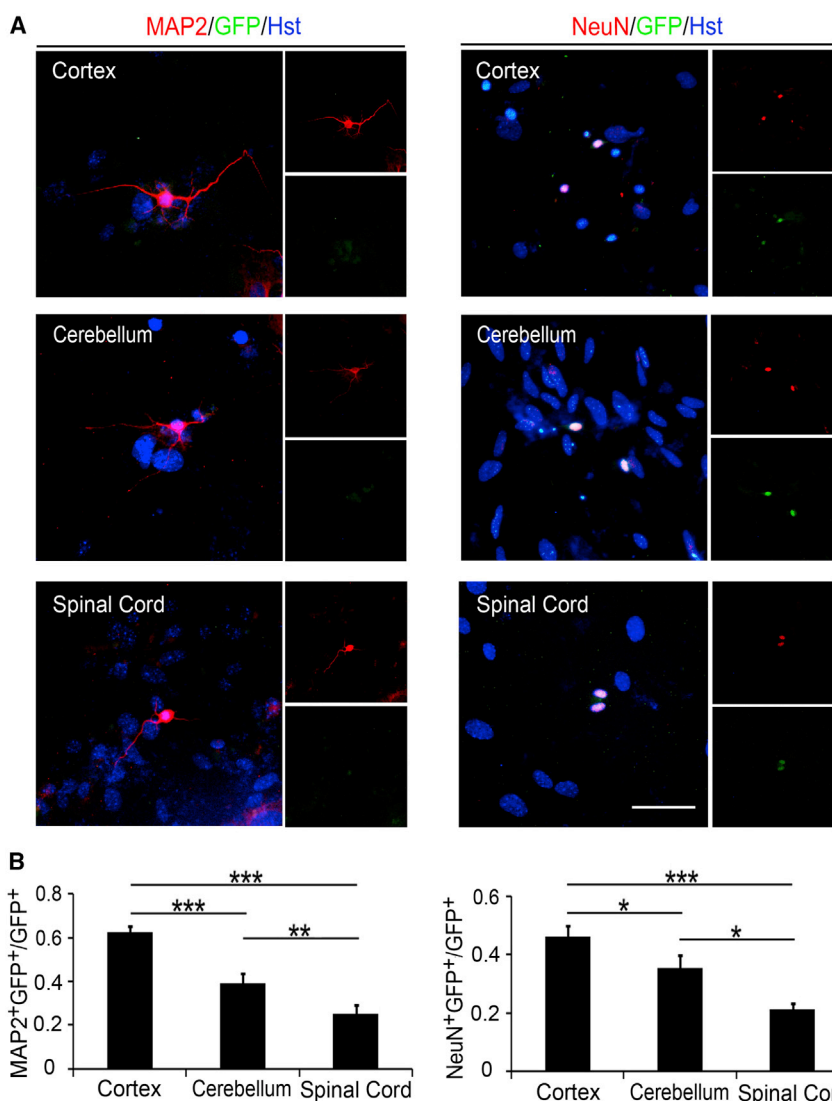

### Figure 3. Maturation of NGN2-Induced Neurons

(A) Representative micrographs of mature NGN2-induced neurons from postnatal astrocytes by staining with mature neuronal marker MAP2 and NeuN at 18 dpi.

(B) Quantification of mature neurons induced from different region-derived postnatal astrocytes ( $n = 3$ ; cells = 500–1,000 for each condition).

\* $p < 0.05$ , \*\* $p < 0.01$ , \*\*\* $p < 0.001$  by ANOVA Tukey's *post hoc* test. Scale bar, 50  $\mu\text{m}$ .

To determine whether the phenotype was also applicable to other transcription factor-mediated neuronal conversion, we also tested the effects of region-restrict astrocyte heterogeneity on the neuronal reprogramming induced by ASCL1. Figure S3A showed that ASCL1 alone can result in the generation of induced neurons expressing Tuj1. Consistent with NGN2, the efficiency of ASCL1-mediated astrocyte-to-neuron conversion was high in the cortex group but rather low in the spinal cord group (Figures S3A and S3B). Taken together, these results demonstrate that no matter what transcription factor is used, region-restrict astrocytes show distinct susceptibility to neuronal reprogramming.

#### Maturation of Region-Restrict Astrocyte-Derived Induced Neurons

As a neuronal marker, Tuj1 is broadly expressed in both immature and mature neurons. Therefore, the maturation

of induced neurons was immunocytochemically analyzed by staining with mature neuronal markers, MAP2 and NeuN. Eighteen days after being induced by NGN2, MAP2 and NeuN were detected in GFP-labeled cells (Figure 3A), indicating that all cortex-, cerebellum-, and spinal cord-derived astrocytes could be reprogrammed into mature neurons. Just as the distinct reprogramming efficiency observed in astrocytes cultured from the three different CNS regions, quantitative analysis also showed that the ratio of either MAP2<sup>+</sup> or NeuN<sup>+</sup> cells was highest in cortex group and lowest in spinal cord group (Figure 3B). This result suggested that the maturation of induced neurons was not affected by the heterogeneity of region-restrict astrocytes.

It was reported that NGN2 and ASCL1 directed cultured astrocytes to mainly generate glutamatergic

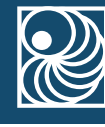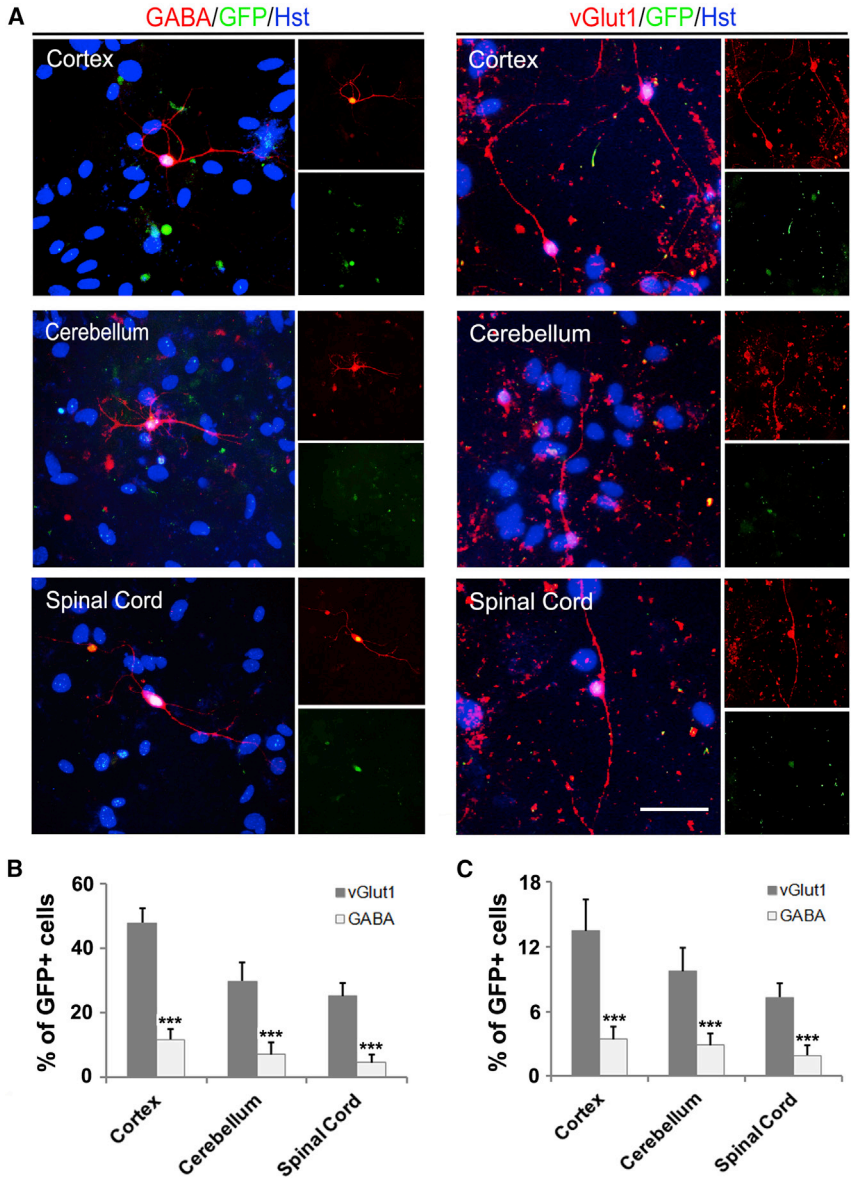

**Figure 4. NGN2-Induced Neurons Mainly Matured into Glutamatergic Neurons**

(A) Representative pictures of mature GABAergic and glutamatergic neurons induced from different region-derived postnatal astrocytes at 18 dpi.

(B and C) Quantification of GABAergic and glutamatergic neurons reprogrammed from different region-derived postnatal (B) or adult (C) astrocytes (n = 3; cells = 300–600 for each condition).

\*\*\*p < 0.001 by ANOVA Tukey's *post hoc* test. Scale bar, 50  $\mu$ m.

and GABAergic neurons, respectively (Berninger et al., 2007; Heinrich et al., 2010). In our study, the subtype of NGN2-induced neurons was identified by immunocytochemical analysis using antibody against vGlut1 or GABA, specific markers for excitatory or inhibitory interneurons, respectively. Figure 4A showed that both vGlut1<sup>+</sup> and GABA<sup>+</sup> neurons could be detected in the NGN2-mediated astrocyte-to-neuron system, suggestive of mixed neurons. In parallel with previous reports, both postnatal and adult cortex-derived astrocytes were primarily converted into vGlut1-labeled excitatory neurons (Figures 4B and 4C). Similarly, the majority of NGN2-induced neurons from either cerebella or spinal cord-derived astrocytes were also glutamatergic

(Figures 4B and 4C). There was only a small proportion of the NGN2-induced neurons that obtained a GABAergic identity. For ASCL1-mediated reprogramming, in contrast, astrocytes cultured from cortex, cerebella, and spinal cord were all mainly converted into GABAergic neurons (Figures S3C and S3D). Therefore, it seemed that the cell identity preference of NGN2- or ASCL1-mediated neuronal reprogramming from astrocytes was not affected by their local origin heterogeneity. Together, all these findings suggest that although region-restrict astrocytes show distinct susceptibility to neuronal reprogramming, the induced neurons can become mature and tend to acquire a glutamatergic or GABAergic identity.

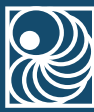

### Identification of Signaling Pathways and Molecules Involved in Mediating the Distinct Susceptibility of Region-Restrict Astrocytes to Neuronal Reprogramming

Because the region-restrict astrocytes exhibit significant heterogeneities in proliferative activity (Figures 1C and S1B), we wanted to know whether the heterogeneous proliferative activity has an effect on the efficiency of NGN2- or ASCL1-mediated neuronal reprogramming. Astrocyte proliferation was blocked with aphidicolin (Abcam ab142400; 5  $\mu$ g/mL, dissolved in DMSO) and infected with NGN2- or ASCL1-expressing lentivirus to induce neuronal reprogramming. As shown in Figure S4, no significant difference was observed in the reprogramming efficiency between aphidicolin- and DMSO-treated astrocytes, suggesting that the proliferation of both postnatal and adult astrocytes did not affect the susceptibility of region-restrict astrocytes to NGN2- or ASCL1-mediated neuronal reprogramming. In addition, it was reported that the metabolic status of the astrocytes is a key parameter for direct neuronal reprogramming (Gascon et al., 2016). To determine whether the heterogeneous neuronal reprogramming efficiency of region-restrict astrocytes results from different metabolic status in these astrocytes, metabolic factors such as reactive oxygen species (ROS), ATP, and lipid peroxidation were examined in these cultured region-restrict astrocytes. Figure S5A–S5E show that no significant difference was observed in the ROS, ATP, or lipid peroxidation level between cortex, cerebellum, and spinal cord astrocytes.

Many factors and signaling pathways closely related to neurogenesis and neural conversion have been identified in previous studies (Hawkins et al., 2014; Lujan et al., 2015; Petersen et al., 2002; Rivetti di Val Cervo et al., 2017; Shan et al., 2011; Wang et al., 2016). For example, INK4a (also known as CDKN2A, cyclin-dependent kinase inhibitor 2A), a tumor suppressor protein that plays an important role in cell-cycle regulation, was identified as a cell-intrinsic barrier for *in vitro* reprogramming (Li et al., 2009). As a transcription factor, ectopic SOX2 could induce neuronal reprogramming of resident astrocytes in the adult mouse brain and spinal cord (Niu et al., 2013; Su et al., 2014a). For signaling pathways, activating the Shh and Wnt pathways was reported to facilitate neural reprogramming from human astrocytes (Rivetti di Val Cervo et al., 2017). BMP4 played key roles in the neural specification and fate decisions at various stages of development (Shan et al., 2011). Moreover, our previous study revealed that the p53-dependent pathway inhibited the overall production of SOX2-induced neuroblasts after spinal cord injury (Wang et al., 2016). To elucidate the mechanism underlying the heterogeneous reprogramming efficiency from region-restrict astrocytes, we firstly examined the expression

of SOX2 and INK4a in astrocytes. However, immunocytochemical analysis showed no significant difference in the expression levels of SOX2 and INK4a in astrocytes cultured from cortex, cerebellum, and spinal cord (Figures S5F–S5I). Furthermore, we also estimated and screened a set of signaling pathways and transcriptional molecules, including *Notch1*, *Shh*, *Bmp4*, *Numb*, *Wnt3a*, *P53*, *Etv5*, and *Nr0b1* (Hawkins et al., 2014; Lujan et al., 2015; Petersen et al., 2002). Real-time PCR analysis showed that the transcriptional level of these molecules varied in astrocytes from postnatal cortex, cerebellum, and spinal cord, reminiscent of the intrinsic diversity among the region-restrict astrocytes (Figure 5A). In the three groups, of note, *Notch1* expression was significantly highest in the spinal astrocytes and lowest in the cortical astrocytes (Figure 5B). Moreover, adult astrocytes showed higher *Notch1* expression level compared with postnatal astrocytes originated from the same region (Figure 5C). The differential expression of NOTCH1 in region-restrict astrocytes was also confirmed at protein level. Consistent with the result of real-time PCR, western blotting revealed that the NOTCH1 protein expressed preferentially in astrocytes from spinal cord compared with that from cortex and cerebellum (Figure 5D). HES1 is a classic target of Notch1 signaling, while NRARP is an upstream negative regulator of NOTCH1 signaling (Yun and Bevan, 2003; Zine et al., 2001). As shown in Figure 5E, *Hes1* gene highly expressed in spinal cord-derived astrocytes compared with that from cortex and cerebellum, which was the opposite to the expression of *Nrarp* gene. Based on these expression patterns, we speculated that the NOTCH1 signaling pathway may be involved in mediating the distinct susceptibility of region-restrict astrocytes to neuronal reprogramming.

### Blocking of NOTCH1 Signaling Can Increase the Efficiency of Neuronal Reprogramming from Astrocytes

To investigate the roles of NOTCH1 signaling in neuronal reprogramming, the  $\gamma$ -secretase inhibitor DAPT (N-[N-(3,5-difluorophenacetyl)-l-alanyl]-S-phenylglycine t-butyl ester) was used to block the pathway (Liu et al., 2014). DAPT can decrease the activity of  $\gamma$ -secretase and inhibit the generation of NICD (NOTCH1 intracellular domain), which is capable of getting through the nuclear membrane to target corresponding downstream genes (Farnie and Clarke., 2007). As shown in Figure 6A, DAPT (Sigma D5942, 10  $\mu$ M, dissolved in DMSO) treatment significantly reduced NOTCH1 level in the astrocytes derived from cortex, cerebellum, and spinal cord, while there was no significant difference in the inhibitory efficiency between the three groups. After treated with DAPT, astrocytes were infected with NGN2- or ASCL1-expressing lentivirus to



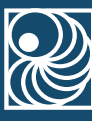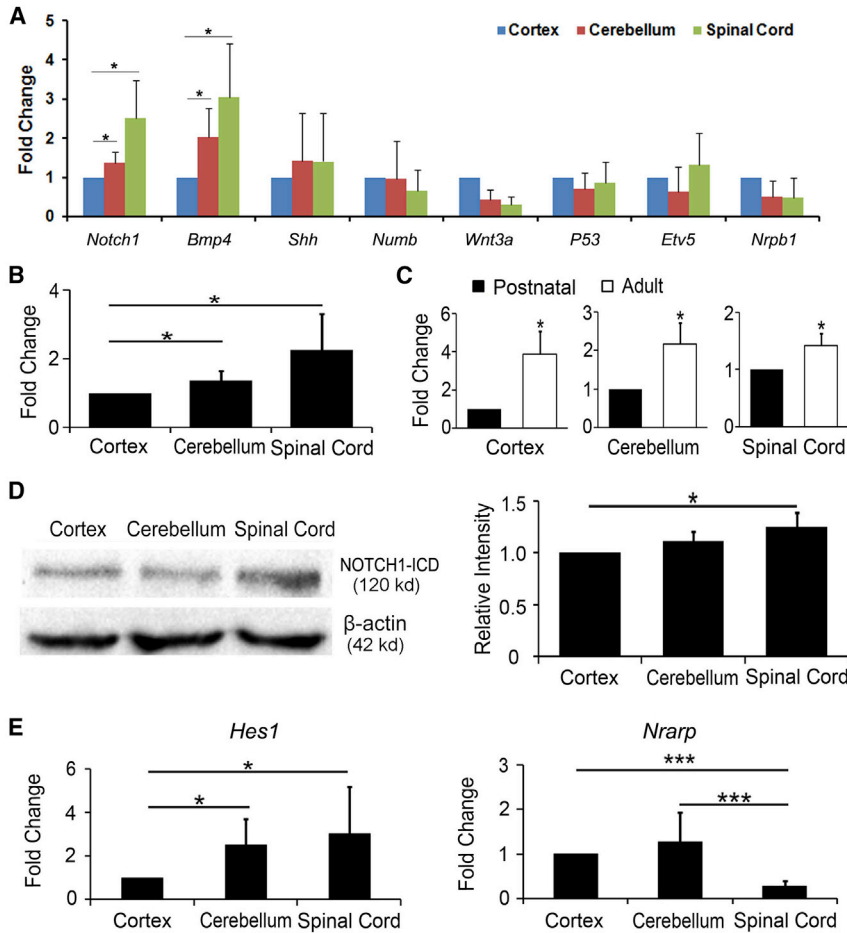

**Figure 5. Expression of Notch1 Signaling Molecules in Heterogeneous Astrocytes**

(A) Heterogeneous expression of molecules associated with neuronal differentiation and specialization in postnatal astrocytes ( $n = 3$  for each group,  $*p < 0.05$  by ANOVA Tukey's *post hoc* test).

(B) *Notch1* expression in regional postnatal astrocytes determined by real-time PCR ( $n = 3$  for each group,  $*p < 0.05$  by ANOVA Tukey's *post hoc* test).

(C) Comparison of *Notch1* expression between postnatal and adult astrocytes by real-time PCR ( $n = 3$  for each group,  $*p < 0.05$  by Student's *t* test).

(D) NOTCH1 expression in regional postnatal astrocytes determined by western blotting.

(E) *Notch1* signaling molecules *Hes1* and *Nrarp* expression in postnatal astrocytes determined by real-time PCR ( $n = 3$  for each group;  $*p < 0.05$ ,  $***p < 0.001$  by ANOVA Tukey's *post hoc* test).

induce neuronal reprogramming (Figures 6B and S6A). Figures 6C and 6D showed that inhibition of NOTCH1 with DAPT resulted in a significant increase in the NGN2-mediated neuronal reprogramming efficiency of postnatal astrocytes from cortex, cerebellum, and spinal cord. Similarly, the efficiency of ASCL1-induced neuronal reprogramming was also significantly increased by treatment of region-restrict astrocytes with DAPT (Figures S6B and S6C). Of note, DAPT treatment did not affect the maturation and cell subtype of the induced neurons from region-restrict astrocytes (Figure S7).

In addition, RNA interference was also used to block *Notch1* signaling. Two short hairpin RNA (shRNA) against *Notch1* were constructed in the lentiviral vectors. The gene expression was under the control of a human *GFAP* promoter to specifically target astrocytes. Western blotting indicated that about 30% and 70% of the expression of NOTCH1 in cortical astrocytes were knocked down by shRNA1 and shRNA2, respectively (Figure 7A). Thus, we used shRNA2 to silence *Notch1* signaling in astrocytes. Figure 7B showed that shRNA2 obviously downregulated NOTCH1 level in the astrocytes derived from cortex, cere-

bellum, and spinal cord, whereas no significant difference was observed in the inhibitory efficiency between the three groups. Astrocytes from cortex, cerebellum, and spinal cord were infected with shRNA2-expressing lentivirus and then subjected to NGN2- or ASCL1-induced neuronal reprogramming (Figures 7C and S6D). Similar to DAPT, blocking the *Notch1* signaling with shRNA2 markedly increased the yield of neurons induced by NGN2 or ASCL1 (Figures 7D, 7E, S6E, and S6F). Together, these results suggest that the NOTCH1 signaling pathway is involved in mediating the distinct susceptibility of region-restrict astrocytes to transcription factor-mediated neuronal reprogramming.

## DISCUSSION

Although astrocytes have been considered to be a homogeneous and non-excitable cell type in the CNS, accumulating evidence suggests that they differ in their morphology, developmental origin, gene expression profile, physiological properties, function, and response to injury and disease. For example, GFAP is mainly expressed



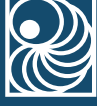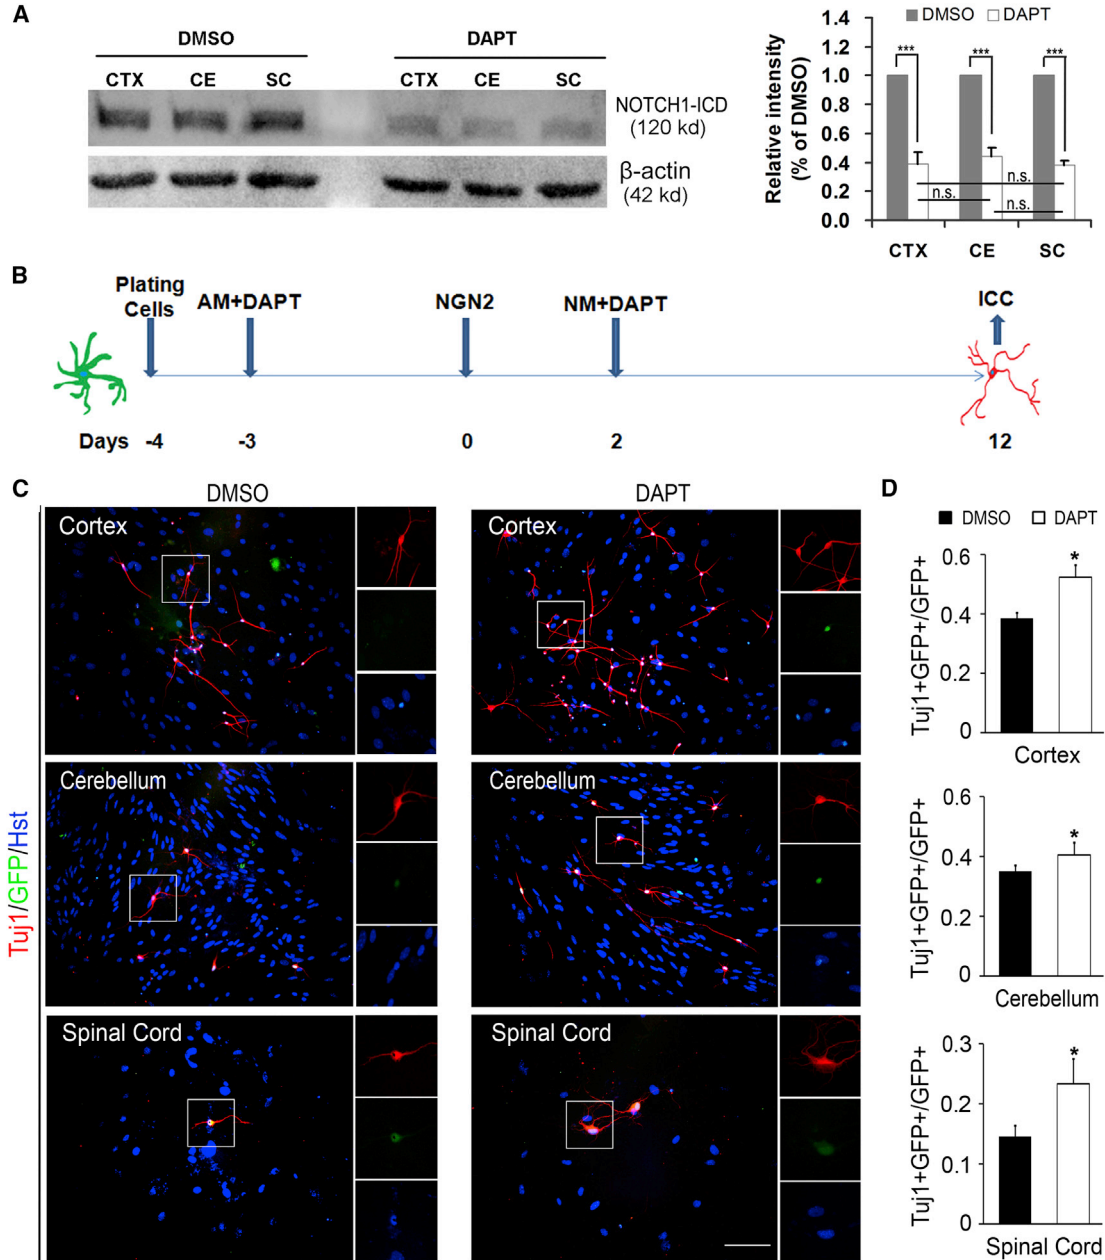

**Figure 6. DAPT Treatment Increased the Efficiency of NGN2-Induced Neuronal Reprogramming from Postnatal Astrocytes**

(A) The knockdown efficiency of DAPT in postnatal astrocytes was determined by western blotting. Quantitative analysis showed no significant difference in the knockdown efficiency of DAPT between cortex (CTX), cerebellum (CE), and spinal cord (SC) astrocytes.  $n = 3$  for each group.  $***p < 0.001$  (Student's *t* test);  $p \geq 0.05$ , no statistically significant difference (n.s.) (ANOVA Tukey's *post hoc* test).

(B) Experimental scheme of blocking NOTCH1 signaling in astrocytes by DAPT during neuronal reprogramming. AM, astrocyte culture medium; NM, neuronal induction medium.

(C) Representative pictures of NGN2-induced neurons with or without DAPT treatment by staining with Tuji1 at 12 dpi.

(D) The efficiency of NGN2-induced neuronal reprogramming in the DAPT group compared with control group ( $n = 3$ ; cells = 1,000–1,700 for each condition).  $*p < 0.05$  by ANOVA Tukey's *post hoc* test. Scale bar, 100  $\mu\text{m}$ .

in astrocytes located in white matter and S100 $\beta$  tends to be expressed in gray matter astrocytes (Ben Haim and Rowitch., 2017; Rusnakova et al., 2013). In contrast to proto-

plasmic astrocytes in cerebral cortex and striatum, high levels of GFAP are expressed in hippocampus-derived astrocytes and Bergmann glia in the cerebellum (Lein et al.,

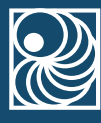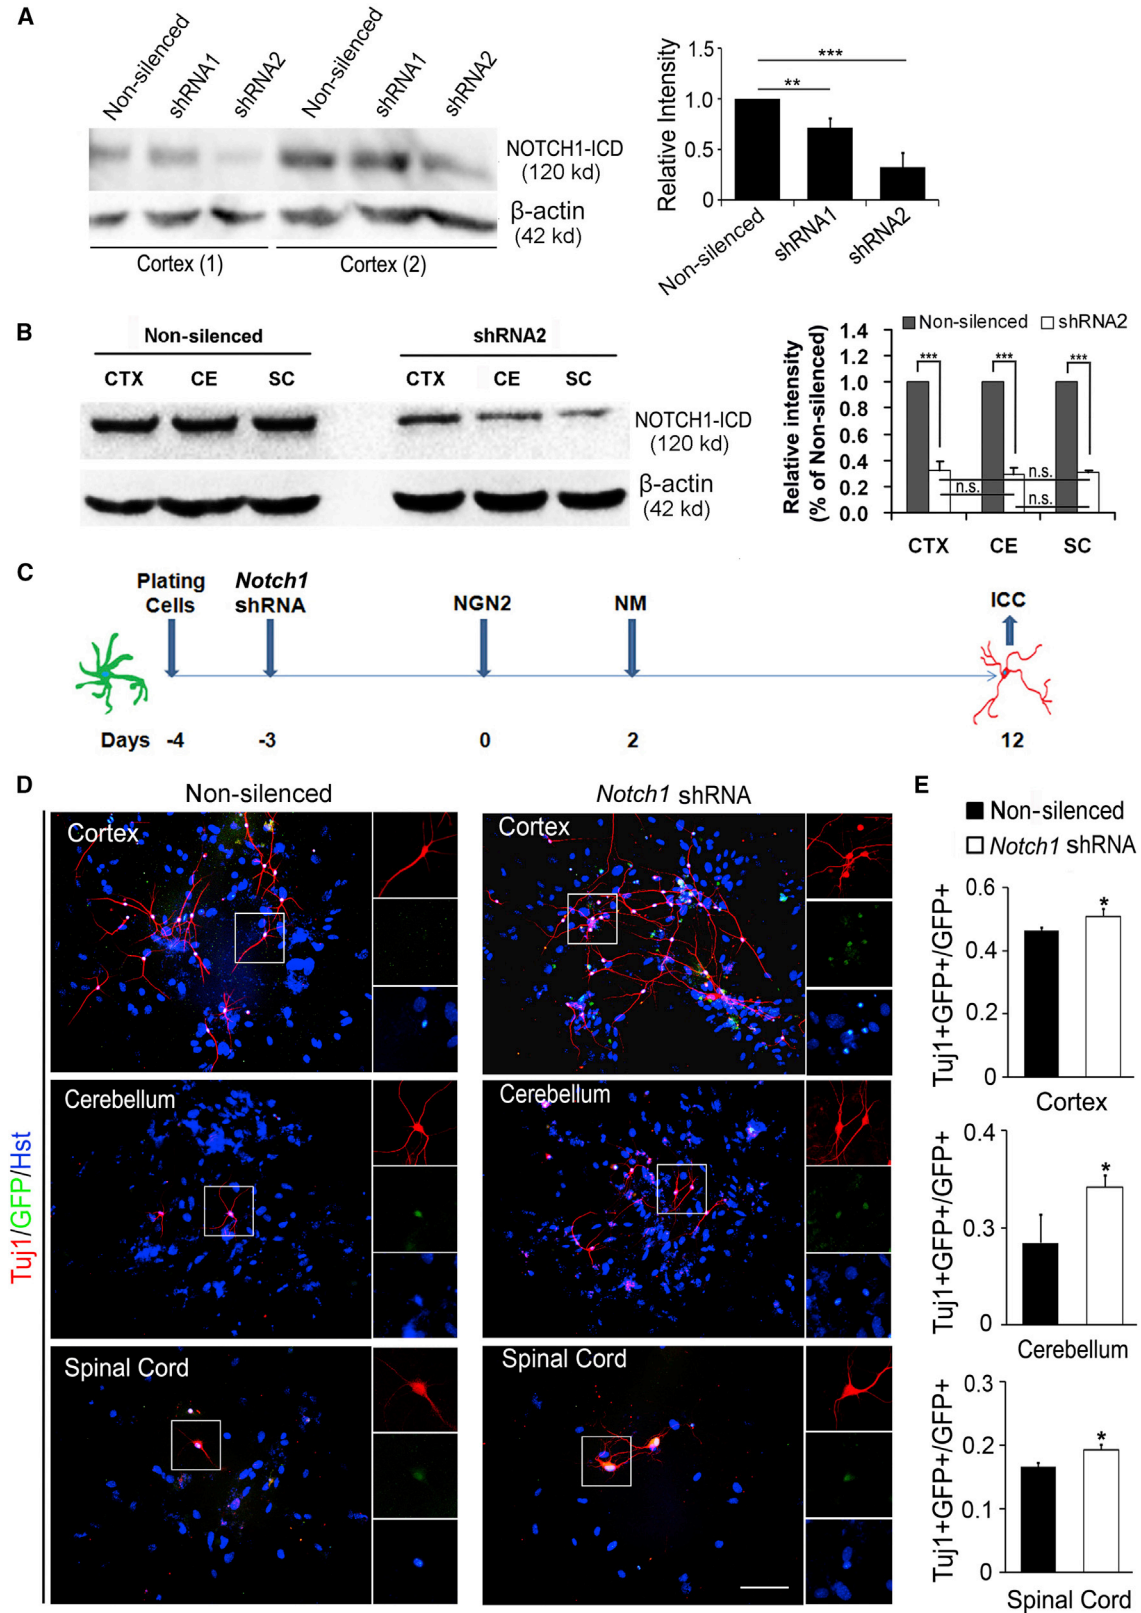

(legend on next page)



2007; Wilhelmsson et al., 2006). The regional differences are also observed in the expression patterns of EAAT isoforms within the gray matter astrocytes (Lehre et al., 1995). Therefore, a better understanding of the heterogeneity of astrocytes will undoubtedly contribute to identification of astroglial function and potential application. By immunohistochemistry and real-time PCR, in present study, distinct expression patterns of the characteristic molecules were observed in astrocytes from postnatal and adult cortex, cerebellum, and spinal cord, suggestive of their molecular heterogeneity. In addition, either postnatal or adult astrocytes from different CNS regions also exhibited significant heterogeneities in the proliferative activity.

Currently, direct lineage reprogramming of astrocytes into induced neurons provides a valuable cell source for regenerative medicine, drug discovery, and disease modeling. It has been documented that cerebral cortex-derived postnatal astrocytes are susceptible to lineage reprogramming into neurons. However, it remains unknown whether astrocytes from other age or other CNS regions are susceptible to neuronal reprogramming. Moreover, whether the astrocyte heterogeneity affect neuronal reprogramming is also not clear. Here, we showed that astrocytes derived from cortex, cerebellum, and spinal cord of postnatal or adult mice could all be converted into neurons by defined transcription factors. Of note, postnatal and adult astrocytes from the same spatial domain showed distinct susceptibility to transcription factor-induced neuronal reprogramming. Likewise, the heterogeneous susceptibility was also observed in the neuronal reprogramming of different region-derived astrocytes. However, it seemed that the maturation and cell subtype of the induced neurons were not affected by the heterogeneity of region-restrict astrocytes.

Notch signaling is an evolutionarily conserved cell-cell contact pathway that was reported to be responsible for neural stem cell maintenance and neurogenesis in the embryonic brain as well as in the adult brain (Imayoshi et al., 2013; Zhang et al., 2018). A key feature of Notch signaling is its remarkable cell-context dependency (Schwanbeck

et al., 2011). In the adult brain, Notch signaling components are highly expressed in astrocytes, which is necessary for maintaining a mature and differentiated astrocyte fate (Cahoy et al., 2008). Intriguingly, NOTCH1 signaling is reduced in astrocytes after stroke, and blocking NOTCH1 signaling triggers astrocytes in the striatum and the medial cortex to enter a neurogenic program, resulting in the generation of new neurons (Magnusson et al., 2014). Thus, we here speculated that region-specific astrocytes might maintain different levels of NOTCH1 signaling that are responsible for the distinct efficiency of neuronal reprogramming. Indeed, our results showed that differential expression of NOTCH1 signaling was observed in astrocytes from cortex, cerebellum, and spinal cord. Spinal cord-derived astrocytes (especially adult astrocytes) expressed high level of NOTCH1 signaling and are not susceptible to neuronal reprogramming. In contrast, low level of NOTCH1 signaling was expressed in cortex-derived astrocytes (especially postnatal astrocytes) that are inclined to neuronal reprogramming. Moreover, blocking NOTCH1 signaling with  $\gamma$ -secretase inhibitor DAPT or lentiviral vector-mediated shRNA resulted in an increase in the efficiency of lineage reprogramming into neurons. All these data suggested that the NOTCH1 signaling pathway might be involved in mediating the distinct susceptibility of region-restrict astrocytes to neuronal reprogramming. Of note, although no significant difference was observed in the knockdown efficiency of DAPT and *Notch1* shRNA between cortical, cerebellum, and spinal cord astrocytes, the increase of neuronal reprogramming efficiency was relatively small in DAPT-treated cerebellum astrocytes and *Notch1* shRNA-treated cortex astrocytes, suggesting that, in addition to the NOTCH1 signaling pathway, other factors might also contribute to the heterogeneous susceptibility of region-restrict astrocytes to neuronal reprogramming.

Although our study provided evidence that the distinct susceptibility of region-restrict astrocytes to neuronal reprogramming might resulted from the different level of NOTCH1 signaling pathway in these cells, the underlying mechanisms remained to be elucidated. As a single-pass

### Figure 7. Interference of NOTCH1 Signaling Increased the Efficiency of NGN2-Induced Neuronal Reprogramming from Postnatal Astrocytes

(A) Western blotting analysis of the knockdown efficiency of *Notch1* shRNA in postnatal cortex astrocytes.  $n = 3$  for each group.  $**p < 0.01$ ,  $***p < 0.001$  by ANOVA Tukey's *post hoc* test.

(B) The knockdown efficiency of *Notch1* shRNA in postnatal astrocytes was determined by western blotting. Quantitative analysis showed no significant difference in the knockdown efficiency of *Notch1* shRNA between cortex (CTX), cerebellum (CE), and spinal cord (SC) astrocytes.  $n = 3$  for each group.  $***p < 0.001$  (Student's *t* test);  $p \geq 0.05$ , no statistically significant difference (n.s.) (ANOVA Tukey's *post hoc* test).

(C) Experimental scheme of Notch1 knockdown in astrocytes by lentivirus-mediated shRNA during neuronal reprogramming.

(D) Representative pictures of NGN2-induced neurons with or without shRNA interference by staining with Tuj1 at 12 dpi.

(E) The efficiency of NGN2-induced neuronal reprogramming in *Notch1* shRNA group compared with control group ( $n = 3$ ; cells = 1,000–1,700 for each condition).  $*p < 0.05$  by ANOVA Tukey's *post hoc* test. Scale bar, 100  $\mu\text{m}$ .

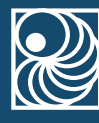

transmembrane receptor, Notch is activated by interaction with its ligands (Jagged or Delta). After undergoing two sequential cleavages mediated by a metalloprotease (ADAM) and a  $\gamma$ -secretase, the NICD is released and then translocates into the nucleus, ultimately activating the transcriptional complex (Andersson et al., 2011). Recently, Notch has been identified as a strong inducer of chromatin remodeling, suggestive of a possible role in regulating higher-order chromatin structures (Wang et al., 2015). It was reported that NICD could block the binding of MEF2C (myocyte enhancer factor 2C) to chromatin and suppress its transcriptional activity in myotubes (Wilson-Rawls et al., 1999). Notch inactivation was shown to increase binding of the transcription factor MEF2C to the promoter regions of cardiac structural genes and promote the reprogramming of mouse fibroblasts into induced cardiac-like myocytes (Abad et al., 2017). These results raise the question of whether the NOTCH1 in region-restrict astrocytes reduce the chromatin accessibility of proneural factors (such as NGN2 and ASCL1) to target genes and make them refractory to neuronal reprogramming. Therefore, further study is needed to fully understand the underlying mechanism.

In summary, our study provided evidence that cortex-, cerebellum-, and spinal cord-derived postnatal or adult astrocytes are heterogeneous populations and they showed distinct susceptibility to transcription factor-mediated neuronal reprogramming. The heterogeneous expression level of NOTCH1 signaling in these region-restrict astrocytes was shown to be responsible for the neuronal reprogramming diversity.

## EXPERIMENTAL PROCEDURES

### Animals

Wild-type newborn (P2–P4) and adult (8–12 weeks old) C57/BL6J mice were obtained from Shanghai Ling Chang Biotech, and used for primary astrocyte culture and histological analysis. The mice were maintained in a conventional animal facility under a controlled temperature and a 12-h light/dark cycle with access to sufficient food and water. All animal care and experimental procedures were performed according to the guidelines recommended by the NIH and were approved by the Animal Experimentation Ethics Committee of the Second Military Medical University.

### Primary Astrocyte Culture

Highly enriched primary postnatal astrocytes were isolated from the cerebral cortex, cerebellum, and spinal cord of newborn mice as described previously (Su et al., 2014a). After removal of the meninges, the tissues were dissociated into a single-cell suspension by trypsinization and mechanical disruption. Cells were pelleted for 4 min at 800 rpm, re-suspended and plated in DMEM medium containing 10% fetal bovine serum (FBS) (Gibco) and 1% penicillin-streptomycin at 37°C with 5% CO<sub>2</sub>. To prepare primary adult

astrocyte, a culture system we previously established was used. The single-cell suspension derived from cerebral cortex, cerebellum, and spinal cord of adult mice was seeded on the culture plate pre-coated with gelatin and Matrigel in DMEM medium containing 20% FBS, forskolin (Fsk) (10  $\mu$ M), glial-derived neurotrophic factor (10 ng/mL), and 1% penicillin-streptomycin at 37°C with 5% CO<sub>2</sub>. For both postnatal and adult astrocytes, the medium was changed every 3 days. When cultured cells grew to confluence, loosely attached microglia and oligodendrocyte precursor cells were removed from the cell monolayer by shaking vigorously. The attached enriched astrocytes were subsequently detached using trypsin-EDTA and then subjected to subsequent experiments. Immunocytochemical analysis by Iba-1 staining showed that there was less than 3% contaminating microglia in the cultured primary adult astrocytes (data not shown).

### Lentivirus Preparation

Plasmids construction and lentivirus production were performed as described previously (Su et al., 2014a; Wang et al., 2016). In brief, cDNAs encoding human NGN2 or ASCL1 were subcloned into a third-generation lentiviral vector (pCSC-SP-IRES-GFP; IRES: internal ribosomal entry site) to generate pCSC-SP-PW-NGN2-IRES-GFP (abbreviated NGN2) or pCSC-SP-PW-ASCL1-IRES-GFP (abbreviated ASCL1). The gene expression was under the control of a human GFAP promoter and the virus-infected cells were visualized by the co-expressed GFP. HEK293T cells were used to generate replication-deficient lentivirus by transient transfection with the lentiviral vector and packaging plasmids (pMDL, VSV-G, and pREV). Lentivirus was collected, precipitated with polyethylene glycol 8000, and concentrated by centrifugation.

### Lineage Reprogramming

For neuronal reprogramming, cultured astrocytes ( $4 \times 10^4$ /mL) were seeded on culture vessels or glass coverslips pre-coated with gelatin and Matrigel. Twenty-four hours after plating, astrocytes were infected with the NGN2- or ASCL1-expressing lentivirus (multiplicity of infection of  $\sim 1$ ) in the presence of 6  $\mu$ g/mL polybrene. The following day, culture medium was switched to neuronal induction medium, DMEM:F12:neurobasal (2: 2: 1) containing 0.8% N-2 (Invitrogen, Carlsbad, CA, USA), and 0.4% B-27 (Invitrogen). Fsk (10  $\mu$ M) and dorsomorphin (1  $\mu$ M) were also added to the above induction medium.

### RNA Interference

Lentiviral vectors encoding *Notch1* shRNA or a scramble shRNA were constructed as described previously (Zhu et al., 2016). The sequences for shRNA are listed below: nonsilencer shRNA (5'-TTCTCCGAACGTGTCACGT-3' and 5'-ACGTGACACGTTCCGAGAA-3'), *Notch1* shRNA1 (5'-CCGGTGCATCAGCCACTTGAATGTTTCAAGAGAACATTCAGTGGCTGATGCTTTTTTGG-3' and 5'-AATTCAAAAAAGCATCAGCCACTTGAATGTTTCTTGAACAATTCAGTGGCTGATGCA-3'), and *Notch1* shRNA2 (5'-CCGGTGGCTATGAATTCACCGTTTCAAGAGAACGGTGAATTCATAGCCCTTTTTTGG-3' and 5'-AATTCAAAAAAGGGCTATGAATTCATAGCCCTTTTTTGG-3'). The knock-down efficiency of NOTCH1 signaling was measured by western blot. The nonsilencer group was used as a control.





## Immunofluorescence

For immunocytochemistry, cells cultured on coverslips were fixed with 4% (w/v) paraformaldehyde (PFA) for 20 min at room temperature and then washed three times with 1 × PBS. For immunohistochemistry, animals were deeply anesthetized with intraperitoneal injection of 10% chloral hydrate and transcardially perfused with 20 mL PBS and 20 mL 4% (w/v) paraformaldehyde (PFA/PBS). The cerebral cortex, cerebellum, and spinal cord were isolated and post-fixed in the perfusion solution overnight at 4°C. After cryoprotection with 30% sucrose in PBS for 48–72 h at 4°C, tissues were frozen in OCT compound and coronal sections were collected on a cryostat (Leica) set at 15–20 μm thickness. Fixed cells or tissue sections were permeabilized and blocked with 0.2% Triton X-100 and 3% BSA in 1 × PBS for 1 h, followed by overnight incubation at 4°C with the primary antibodies listed below: GFAP (Sigma G3893, mouse, 1:100), GFAP (Boster M00213, rabbit, 1:100), Aldoc (Santa Cruz sc-12065, goat, 1:50), Tuj-1 (Covance MMS-435P, mouse, 1:500), GFP (Aves GFP-1020, chicken, 1:600), NeuN (Sigma MAB377, mouse, 1:100), Map2 (Abcam ab32454, rabbit, 1:200), GABA (Sigma A2052, rabbit, 1:200), and vGlut1 (SYSY 135302, rabbit, 1:100). The corresponding secondary antibodies conjugated with Alexa Fluor 543, 488, or 647 (Jackson ImmunoResearch Laboratories) were applied at 1:200 dilution for indirect fluorescence. Nuclei were counterstained with Hoechst (Sigma 33,342, 1:1,000). Images were captured with an Olympus fluorescence microscope or a Zeiss LSM 510 confocal microscope.

## Cell Proliferation Assays

*In vitro*, proliferating cells were labeled by incubation with 10 mM bromodeoxyuridine (BrdU) (Sigma B5002) diluted in culture medium for 12–16 h as described previously (Su et al., 2014b). In brief, 4% PFA-fixed cells were treated with 2 M HCl for 30 min at 37°C to denature DNA, rinsed in 0.1 M boric acid for 10 min to neutralize excess HCl, and incubated with blocking solution (0.2% Triton X-100 and 3% BSA in 1 × PBS) for 1 h. The BrdU incorporation was detected by fluorescent staining using an anti-BrdU antibody (Sigma B8434, mouse, 1:200). In addition, proliferating cells were also detected directly with antibodies such as Ki67 (Abcam ab6526, mouse, 1:100) and PCNA (Boster BM0104, mouse, 1:100).

## Real-Time qPCR

Real-time qPCR was performed as described previously (Sun et al., 2017). In brief, total RNA was extracted from cultured cells using TRIzol Reagent, and then reverse transcribed to cDNA using a RevertAid First Strand cDNA Synthesis Kit (Fermentas) according to the manufacturer's instructions. Based on SYBR green I dye detection, real-time PCR assay was carried out using the corresponding primers (detailed in Table S1), and mRNA expression in each sample was normalized to *GAPDH*. The data were analyzed using the  $2^{-\Delta\Delta Ct}$  method.

## Western Blot Analysis

Total proteins were extracted from cultured astrocytes at a specified time point. Then the proteins were electrophoresed on a 10% SDS-PAGE gel, followed by being transferred onto nitrocellulose membranes. The membranes were then blocked in 5% nonfat milk and incubated with specific primary antibodies against

NOTCH1 (Santa Cruz sc-9170, rabbit, 1:200) and β-actin (Proteintech 60008-1-Ig, mouse, 1:5,000). Immunoreactive bands were visualized using IRDye 700- or 800-conjugated secondary antibodies and chemiluminescence reagents (ECL, Amersham) according to the manufacturer's instructions. The results were scanned using the Odyssey infrared imaging system and analyzed with Image-Pro Plus 6.0 software.

## Statistical Analysis

All results are validated by at least three independent experiments. The quantitative data were expressed as mean ± SD. Statistical analysis was performed using Student's *t* test or one-way ANOVA with Tukey's *post hoc* test. Differences were considered statistically significant at *p* < 0.05.

## SUPPLEMENTAL INFORMATION

Supplemental Information includes Supplemental Experimental Procedures, seven figures, and one table and can be found with this article online at <https://doi.org/10.1016/j.stemcr.2018.12.017>.

## AUTHOR CONTRIBUTIONS

X. Hu, C.H., and Z.S. conceived and designed the experiments. X. Hu, S.Q., X. Huang, Y.Y., Z.T., Y.G., X.C., and D.W. performed the experiments. X.-F.L. provided critical technical inputs. X. Hu, S.Q., X. Huang, C.H., and Z.S. analyzed the data and prepared the manuscript. All authors reviewed and approved the manuscript.

## ACKNOWLEDGMENTS

This work was supported by the National Natural Science Foundation (31671110), the National Key Research and Development Program of China (2016YFA0100802) and the Science and Technology Commission of Shanghai Municipality (15JC1400202).

Received: June 19, 2018

Revised: December 26, 2018

Accepted: December 28, 2018

Published: January 31, 2019

## REFERENCES

- Abad, M., Hashimoto, H., Zhou, H., Morales, M.G., Chen, B., Basel-Duby, R., and Olson, E.N. (2017). Notch inhibition enhances cardiac reprogramming by increasing MEF2C transcriptional activity. *Stem Cell Reports* 8, 548–560.
- Andersson, E.R., Sandberg, R., and Lendahl, U. (2011). Notch signaling: simplicity in design, versatility in function. *Development* 138, 3593–3612.
- Bachoo, R.M., Kim, R.S., Ligon, K.L., Maher, E.A., Brennan, C., Billings, N., Chan, S., Li, C., Rowitch, D.H., Wong, W.H., et al. (2004). Molecular diversity of astrocytes with implications for neurological disorders. *Proc. Natl. Acad. Sci. U S A* 101, 8384–8389.
- Ben Haim, L., and Rowitch, D.H. (2017). Functional diversity of astrocytes in neural circuit regulation. *Nat. Rev. Neurosci.* 18, 31–41.

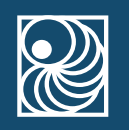

- Berninger, B., Costa, M.R., Koch, U., Schroeder, T., Sutor, B., Grothe, B., and Gotz, M. (2007). Functional properties of neurons derived from in vitro reprogrammed postnatal astroglia. *J. Neurosci.* *27*, 8654–8664.
- Buosi, A.S., Matias, I., Araujo, A.P.B., Batista, C., and Gomes, F.C.A. (2018). Heterogeneity in synaptogenic profile of astrocytes from different brain regions. *Mol. Neurobiol.* *55*, 751–762.
- Cahoy, J.D., Emery, B., Kaushal, A., Foo, L.C., Zamanian, J.L., Christopherson, K.S., Xing, Y., Lubischer, J.L., Krieg, P.A., Krupenko, S.A., et al. (2008). A transcriptome database for astrocytes, neurons, and oligodendrocytes: a new resource for understanding brain development and function. *J. Neurosci.* *28*, 264–278.
- Chaboub, L.S., and Deneen, B. (2012). Developmental origins of astrocyte heterogeneity: the final frontier of CNS development. *Dev. Neurosci.* *34*, 379–388.
- Denis-Donini, S., Glowinski, J., and Prochiantz, A. (1984). Glial heterogeneity may define the three-dimensional shape of mouse mesencephalic dopaminergic neurones. *Nature* *307*, 641–643.
- Emsley, J.G., and Macklis, J.D. (2006). Astroglial heterogeneity closely reflects the neuronal-defined anatomy of the adult murine CNS. *Neuron Glia Biol.* *2*, 175–186.
- Farnie, G., and Clarke, R.B. (2007). Mammary stem cells and breast cancer—role of Notch signalling. *Stem Cell Rev.* *3*, 169–175.
- Gascon, S., Murenu, E., Masserdotti, G., Ortega, F., Russo, G.L., Petrik, D., Deshpande, A., Heinrich, C., Karow, M., Robertson, S.P., et al. (2016). Identification and successful negotiation of a metabolic checkpoint in direct neuronal reprogramming. *Cell Stem Cell* *18*, 396–409.
- Grande, A., Sumiyoshi, K., Lopez-Juarez, A., Howard, J., Sakthivel, B., Aronow, B., Campbell, K., and Nakafuku, M. (2013). Environmental impact on direct neuronal reprogramming in vivo in the adult brain. *Nat. Commun.* *4*, 2373.
- Guo, Z., Zhang, L., Wu, Z., Chen, Y., Wang, F., and Chen, G. (2014). In vivo direct reprogramming of reactive glial cells into functional neurons after brain injury and in an Alzheimer's disease model. *Cell Stem Cell* *14*, 188–202.
- Hashemian, S., O'Rourke, C., Phillips, J.B., Stromberg, I., and Af Bjerken, S. (2015). Embryonic and mature astrocytes exert different effects on neuronal growth in rat ventral mesencephalic slice cultures. *Springerplus* *4*, 558.
- Hawkins, K., Joy, S., and McKay, T. (2014). Cell signalling pathways underlying induced pluripotent stem cell reprogramming. *World J. Stem Cells* *6*, 620–628.
- Heinrich, C., Blum, R., Gascon, S., Masserdotti, G., Tripathi, P., Sanchez, R., Tiedt, S., Schroeder, T., Gotz, M., and Berninger, B. (2010). Directing astroglia from the cerebral cortex into subtype specific functional neurons. *PLoS Biol.* *8*, e1000373.
- Hu, X., Yuan, Y., Wang, D., and Su, Z. (2016). Heterogeneous astrocytes: active players in CNS. *Brain Res. Bull.* *125*, 1–18.
- Imayoshi, I., Shimojo, H., Sakamoto, M., Ohtsuka, T., and Kagiyama, R. (2013). Genetic visualization of notch signaling in mammalian neurogenesis. *Cell Mol. Life Sci.* *70*, 2045–2057.
- Lehre, K.P., Levy, L.M., Ottersen, O.P., Storm-Mathisen, J., and Danbolt, N.C. (1995). Differential expression of two glial glutamate transporters in the rat brain: quantitative and immunocytochemical observations. *J. Neurosci.* *15*, 1835–1853.
- Lein, E.S., Hawrylycz, M.J., Ao, N., Ayres, M., Bensinger, A., Bernard, A., Boe, A.F., Boguski, M.S., Brockway, K.S., Byrnes, E.J., et al. (2007). Genome-wide atlas of gene expression in the adult mouse brain. *Nature* *445*, 168–176.
- Li, H., Collado, M., Villasante, A., Strati, K., Ortega, S., Canamero, M., Blasco, M.A., and Serrano, M. (2009). The Ink4/Arf locus is a barrier for iPS cell reprogramming. *Nature* *460*, 1136–1139.
- Liu, Y., Li, P., Liu, K., He, Q., Han, S., Sun, X., Li, T., and Shen, L. (2014). Timely inhibition of Notch signaling by DAPT promotes cardiac differentiation of murine pluripotent stem cells. *PLoS One* *9*, e109588.
- Lujan, E., Zunder, E.R., Ng, Y.H., Goronzy, I.N., Nolan, G.P., and Wernig, M. (2015). Early reprogramming regulators identified by prospective isolation and mass cytometry. *Nature* *521*, 352–356.
- Magnusson, J.P., Goritz, C., Tatarishvili, J., Dias, D.O., Smith, E.M., Lindvall, O., Kokaia, Z., and Frisen, J. (2014). A latent neurogenic program in astrocytes regulated by Notch signaling in the mouse. *Science* *346*, 237–241.
- Matyash, V., and Kettenmann, H. (2010). Heterogeneity in astrocyte morphology and physiology. *Brain Res. Rev.* *63*, 2–10.
- Molofsky, A.V., Krencik, R., Ullian, E.M., Tsai, H.H., Deneen, B., Richardson, W.D., Barres, B.A., and Rowitch, D.H. (2012). Astrocytes and disease: a neurodevelopmental perspective. *Genes Dev.* *26*, 891–907.
- Niu, W., Zang, T., Zou, Y., Fang, S., Smith, D.K., Bachoo, R., and Zhang, C.L. (2013). In vivo reprogramming of astrocytes to neuroblasts in the adult brain. *Nat. Cell Biol.* *15*, 1164–1175.
- Oberheim, N.A., Goldman, S.A., and Nedergaard, M. (2012). Heterogeneity of astrocytic form and function. *Methods Mol. Biol.* *814*, 23–45.
- Okuda, H. (2018). A review of functional heterogeneity among astrocytes and the CSS6-specific antibody-mediated detection of a subpopulation of astrocytes in adult brains. *Anat. Sci. Int.* *93*, 161–168.
- Petersen, P.H., Zou, K., Hwang, J.K., Jan, Y.N., and Zhong, W. (2002). Progenitor cell maintenance requires numb and numbl like during mouse neurogenesis. *Nature* *419*, 929–934.
- Rivetti di Val Cervo, P., Romanov, R.A., Spigolon, G., Masini, D., Martin-Montanez, E., Toledo, E.M., La Manno, G., Feyder, M., Pifl, C., Ng, Y.H., et al. (2017). Induction of functional dopamine neurons from human astrocytes in vitro and mouse astrocytes in a Parkinson's disease model. *Nat. Biotechnol.* *35*, 444–452.
- Rusnakova, V., Honsa, P., Dzamba, D., Stahlberg, A., Kubista, M., and Anderova, M. (2013). Heterogeneity of astrocytes: from development to injury — single cell gene expression. *PLoS One* *8*, e69734.
- Schwanbeck, R., Martini, S., Bernoth, K., and Just, U. (2011). The Notch signaling pathway: molecular basis of cell context dependency. *Eur. J. Cell Biol.* *90*, 572–581.
- Shan, Z.Y., Liu, F., Lei, L., Li, Q.M., Jin, L.H., Wu, Y.S., Li, X., and Shen, J.L. (2011). Generation of dorsal spinal cord GABAergic neurons from mouse embryonic stem cells. *Cell Reprogram.* *13*, 85–91.

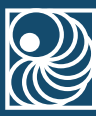

- Su, Z., Niu, W., Liu, M.L., Zou, Y., and Zhang, C.L. (2014a). In vivo conversion of astrocytes to neurons in the injured adult spinal cord. *Nat. Commun.* *5*, 3338.
- Su, Z., Zang, T., Liu, M.L., Wang, L.L., Niu, W., and Zhang, C.L. (2014b). Reprogramming the fate of human glioma cells to impede brain tumor development. *Cell Death Dis.* *5*, e1463.
- Sun, X., Hu, X., Wang, D., Yuan, Y., Qin, S., Tan, Z., Gu, Y., Huang, X., He, C., and Su, Z. (2017). Establishment and characterization of primary astrocyte culture from adult mouse brain. *Brain Res. Bull.* *132*, 10–19.
- Takahashi, K., and Yamanaka, S. (2006). Induction of pluripotent stem cells from mouse embryonic and adult fibroblast cultures by defined factors. *Cell* *126*, 663–676.
- Tsai, H.H., Li, H., Fuentealba, L.C., Molofsky, A.V., Taveira-Marques, R., Zhuang, H., Tenney, A., Murnen, A.T., Fancy, S.P., Merkle, F., et al. (2012). Regional astrocyte allocation regulates CNS synaptogenesis and repair. *Science* *337*, 358–362.
- Wang, H., Zang, C., Liu, X.S., and Aster, J.C. (2015). The role of Notch receptors in transcriptional regulation. *J. Cell Physiol.* *230*, 982–988.
- Wang, L.L., Su, Z., Tai, W., Zou, Y., Xu, X.M., and Zhang, C.L. (2016). The p53 pathway controls SOX2-mediated reprogramming in the adult mouse spinal cord. *Cell Rep.* *17*, 891–903.
- Wilhelmsson, U., Bushong, E.A., Price, D.L., Smarr, B.L., Phung, V., Terada, M., Ellisman, M.H., and Pekny, M. (2006). Redefining the concept of reactive astrocytes as cells that remain within their unique domains upon reaction to injury. *Proc. Natl. Acad. Sci. U S A* *103*, 17513–17518.
- Wilson-Rawls, J., Molkentin, J.D., Black, B.L., and Olson, E.N. (1999). Activated notch inhibits myogenic activity of the MADS-Box transcription factor myocyte enhancer factor 2C. *Mol. Cell. Biol.* *19*, 2853–2862.
- Yun, T.J., and Bevan, M.J. (2003). Notch-regulated ankyrin-repeat protein inhibits Notch1 signaling: multiple Notch1 signaling pathways involved in T cell development. *J. Immunol.* *170*, 5834–5841.
- Zhang, R., Engler, A., and Taylor, V. (2018). Notch: an interactive player in neurogenesis and disease. *Cell Tissue Res.* *371*, 73–89.
- Zhang, Y., and Barres, B.A. (2010). Astrocyte heterogeneity: an underappreciated topic in neurobiology. *Curr. Opin. Neurobiol.* *20*, 588–594.
- Zhu, Y.B., Gao, W., Zhang, Y., Jia, F., Zhang, H.L., Liu, Y.Z., Sun, X.F., Yin, Y., and Yin, D.M. (2016). Astrocyte-derived phosphatidic acid promotes dendritic branching. *Sci. Rep.* *6*, 21096.
- Zine, A., Aubert, A., Qiu, J., Therianos, S., Guillemot, F., Kageyama, R., and de Ribaupierre, F. (2001). Hes1 and Hes5 activities are required for the normal development of the hair cells in the mammalian inner ear. *J. Neurosci.* *21*, 4712–4720.

**Stem Cell Reports, Volume 12**

**Supplemental Information**

**Region-Restrict Astrocytes Exhibit Heterogeneous Susceptibility to  
Neuronal Reprogramming**

**Xin Hu, Shangyao Qin, Xiao Huang, Yimin Yuan, Zijian Tan, Yakun Gu, Xueyan  
Cheng, Dan Wang, Xiao-Feng Lian, Cheng He, and Zhida Su**



## Supplemental Figures and Legends

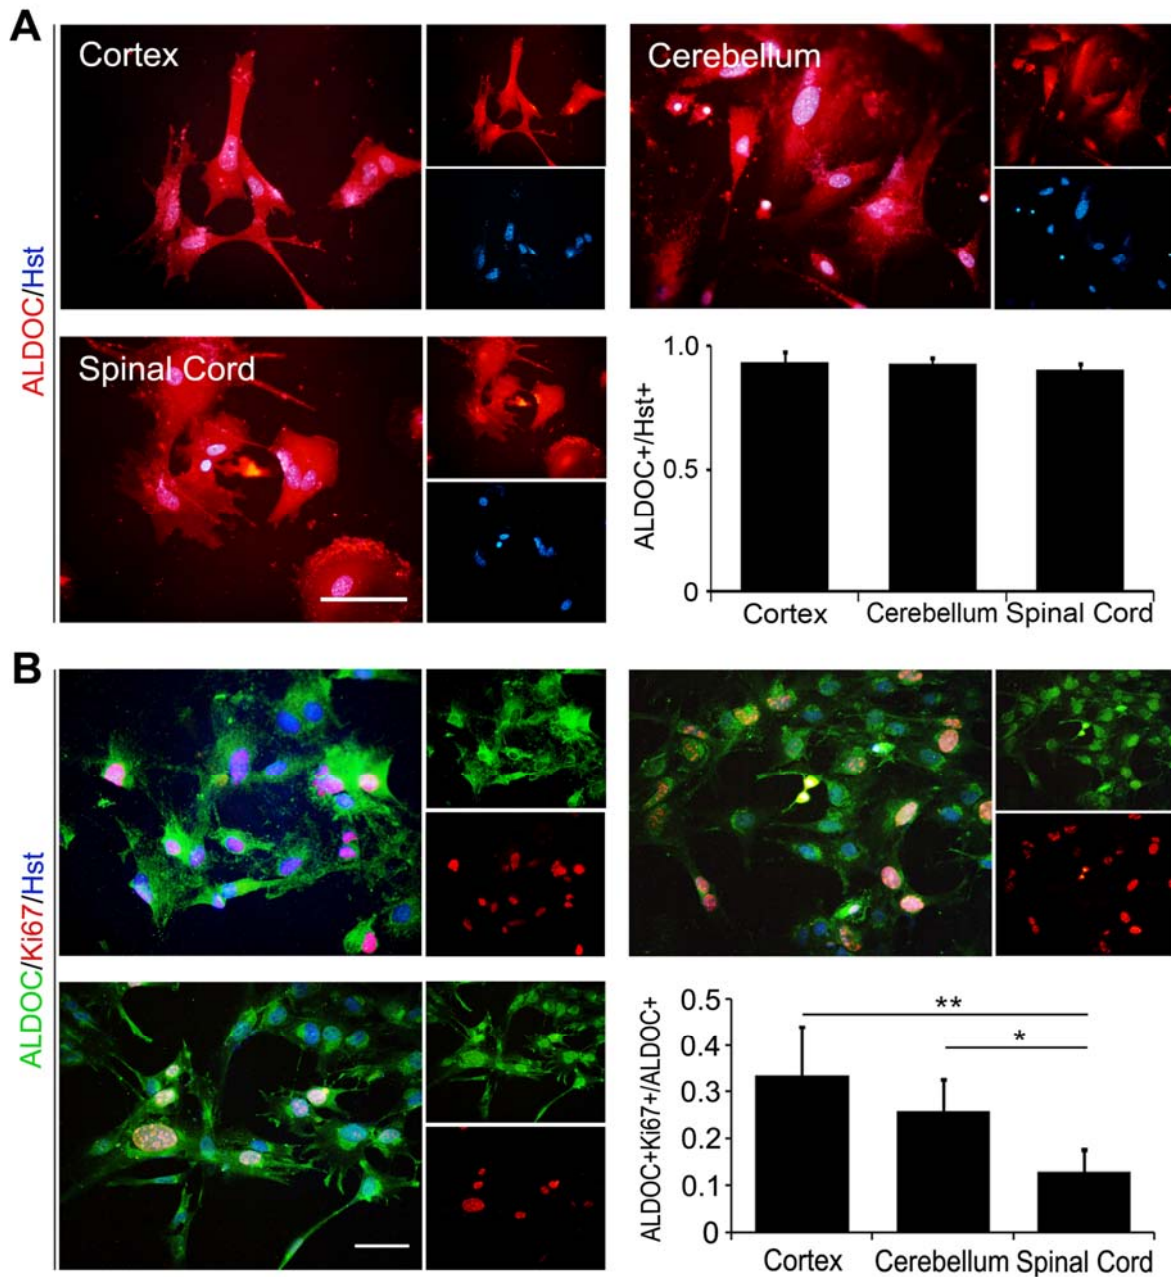

**Figure S1 Establishment and characterization of primary astrocyte culture from adult mouse.** (A) The purity of adult mouse astrocytes was determined by staining with anti-Aldoc and Hoechst ( $n = 3$ ; cells = 1,000-1,500 for each condition). (B) Analysis of the proliferation of cultured adult mouse astrocytes ( $n = 3$ ; cells = 1,000-1,500 for each condition). \* $P < 0.05$ , \*\* $P < 0.01$  by ANOVA Tukey's post hoc test. Scale bar = 50  $\mu\text{m}$ .

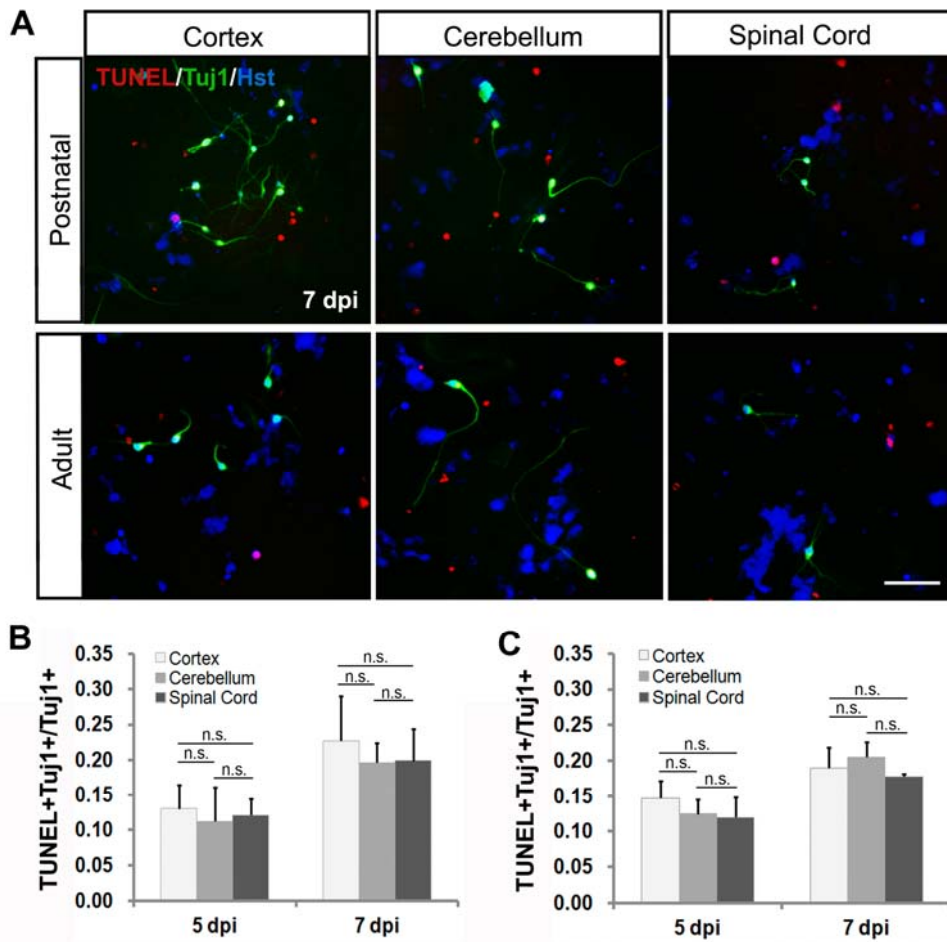

**Figure S2 Neuronal apoptosis was quantitatively analyzed by TUNEL staining. (A)** Representative micrographs of TUNEL (Cat: 12156792910, Roche) staining in NGN2-induced neurons from postnatal and adult astrocytes at 7 dpi. **(B and C)** Histograms showing the percentage of NGN2-induced neurons from postnatal (B) and adult (C) astrocytes as indicated at 5 and 7 dpi ( $n = 3$ ; cells = 200-600 for each condition).  $P \geq 0.05$ , no statistically significant difference (n.s.); ANOVA Tukey's post hoc test. Scale bar = 100  $\mu\text{m}$ .

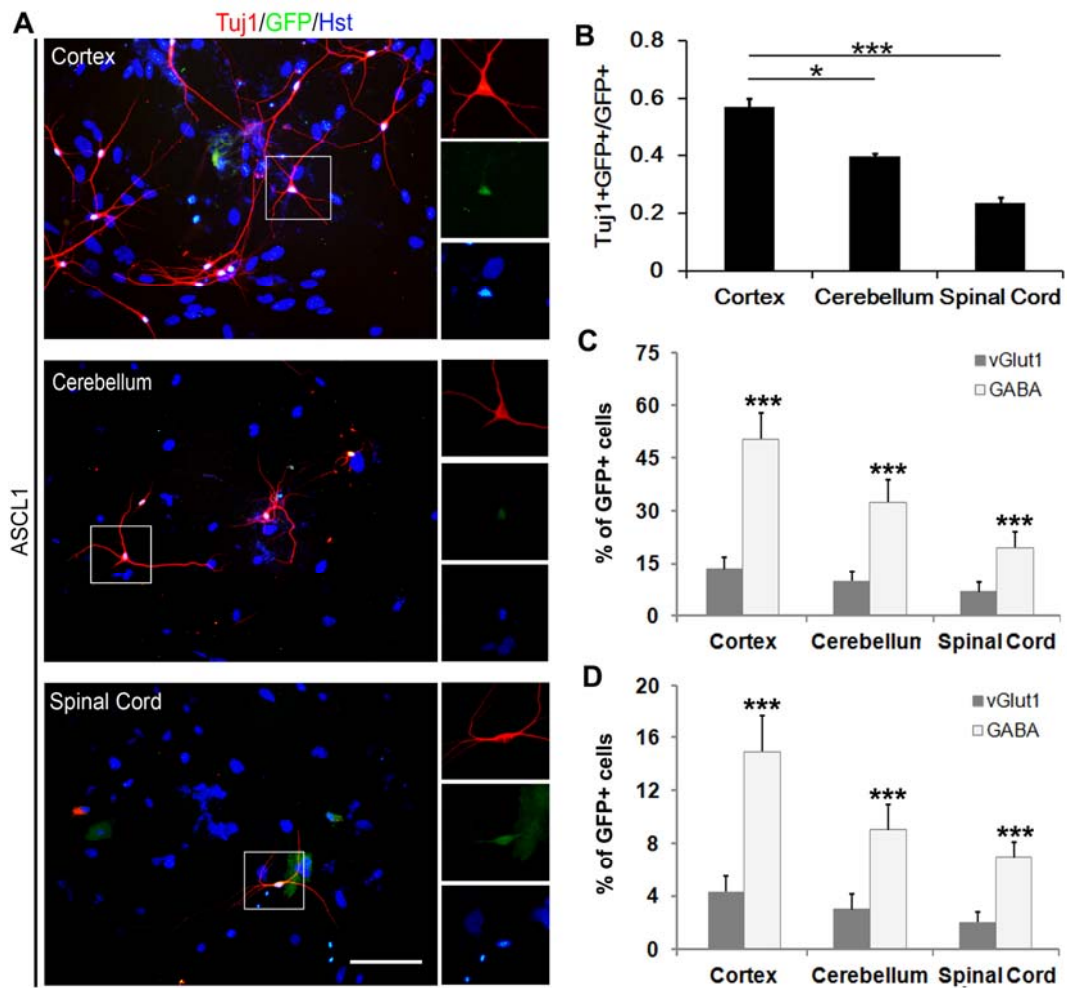

**Figure S3 The ASCL1-induced neuronal reprogramming of postnatal astrocytes. (A)** Representative pictures of ASCL1-induced neurons from postnatal astrocytes by staining with Tuj1 at 12dpi. **(B)** ASCL1-induced neuronal reprogramming efficiency of postnatal astrocytes ( $n = 3$ ; cells = 900-1,500 for each condition).  $*P < 0.05$ ,  $***P < 0.001$  by ANOVA Tukey's post hoc test. **(C and D)** ASCL1-induced neurons mainly matured into GABAergic neurons. Quantification of GABAergic and glutamatergic neurons reprogrammed from different region-derived postnatal (C) or adult (D) astrocytes at 18 dpi ( $n = 3$ ; cells = 300-600 for each condition).  $***P < 0.001$  by Student's t test. Scale bar = 100  $\mu\text{m}$ .

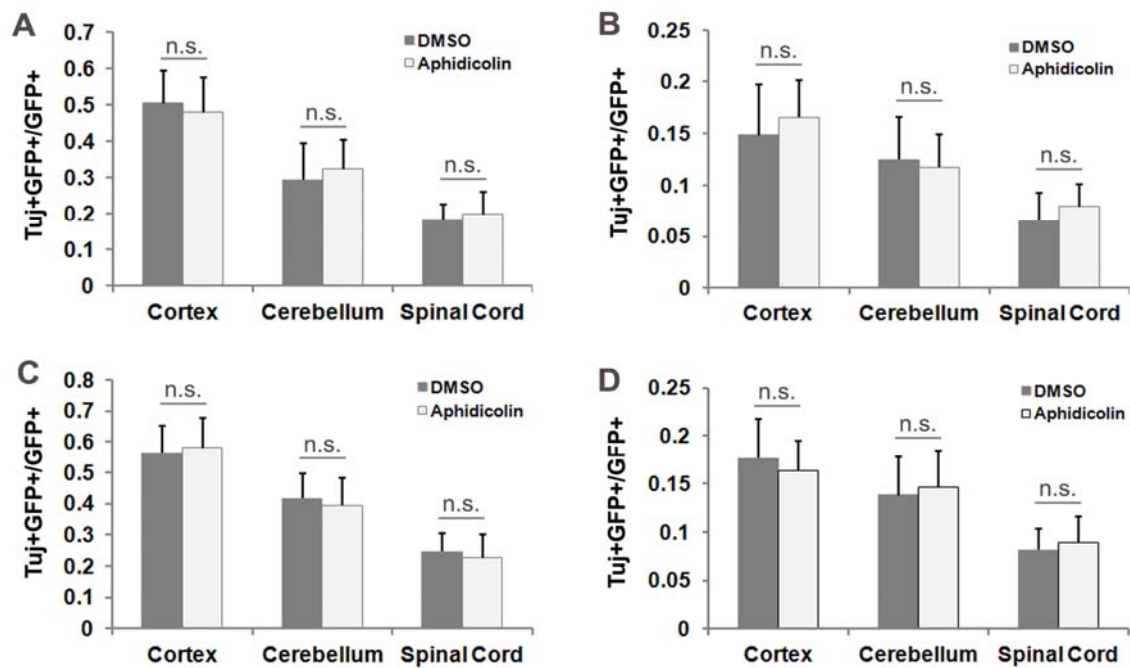

**Figure S4 Effect of astrocyte proliferation on the neuronal reprogramming efficiency of region-restrict astrocytes. (A and B)** The cultured postnatal (A) and adult (B) astrocytes were treated with aphidicolin (Cat: ab142400, Abcam; 5  $\mu$ g/mL, dissolved in DMSO) to block cell proliferation. DMSO treatment was used as control. At 12 dpi, the efficiency of NGN2-induced neuronal reprogramming was analyzed in aphidicolin group compared with DMSO group (n = 3; cells = 700-1,400 for each condition). **(C and D)** After treatment of cultured postnatal (C) and adult (D) astrocytes with aphidicolin, the efficiency of ASCL1-induced neuronal reprogramming was analyzed between aphidicolin and DMSO groups (n = 3; cells = 700-1,500 for each condition) at 12 dpi.  $P \geq 0.05$ , no statistically significant difference (n.s.); Student's t test.



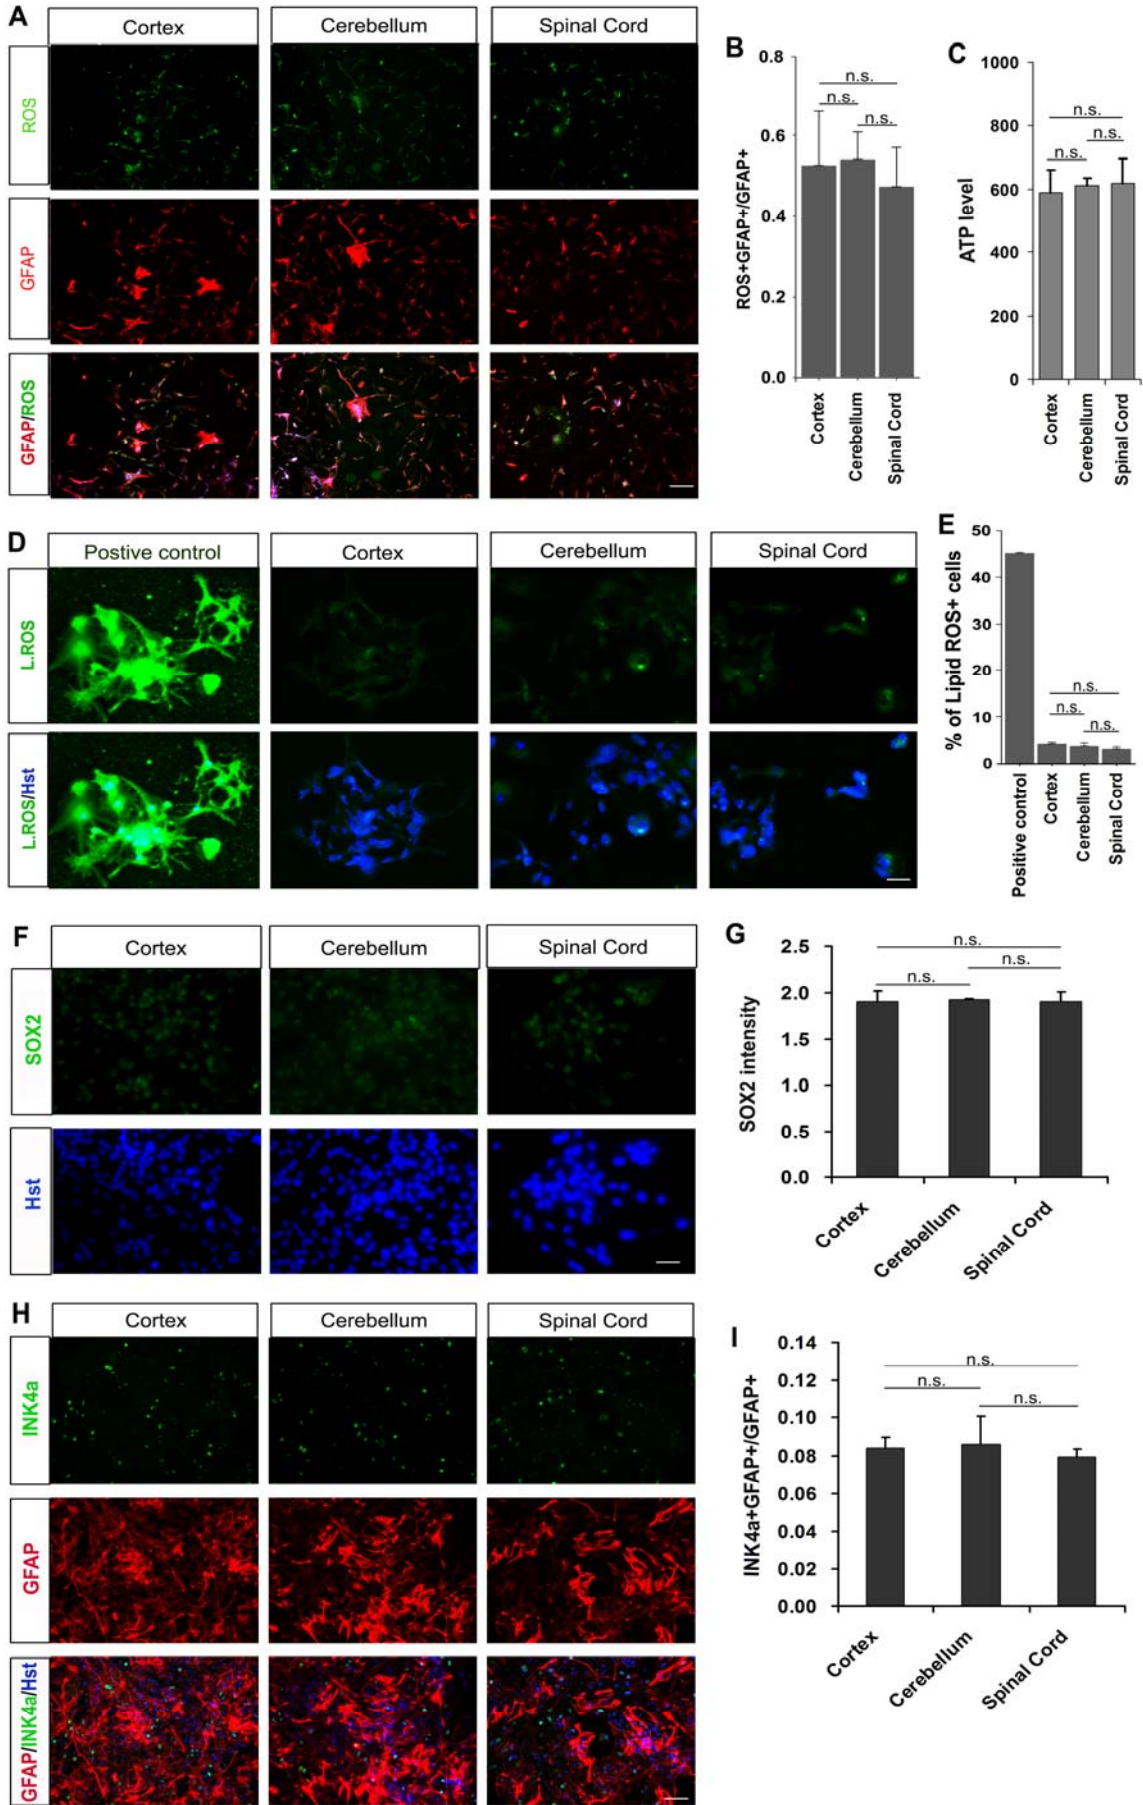

**Figure S5 Analysis of the metabolic status and molecular expression of astrocytes. (A and B)** The general ROS in postnatal astrocytes was detected with CellROX Oxidative Stress Reagent (Cat: C10448, Molecular probes) (n = 3; cells = 300-500 for each condition). **(C)** ATP levels of postnatal astrocytes were measured with ATP Assay Kit (Cat: S0026, Beyotime). **(D and E)** Analysis of lipid peroxidation in postnatal astrocytes with The Click-iT Lipid peroxidation Kit based on linoleamide alkyne (LAA) reagent (Cat: C10446, Life technologies) (n = 3; cells = 200-500 for each condition). Treatment of astrocytes with 100  $\mu$ M cumene hydroperoxide was used as positive control. **(F-I)** Analysis of the expression of SOX2 and INK4a in astrocytes. Immunocytochemical analysis of SOX2 (Cat: AB5603A4, Milipore; F and G) and INK4a (Cat: Ab211542, Abcam; H and I) was performed in cultured postnatal astrocytes from cortex, cerebellum and spinal cord (G and I, n = 3, cells = 500-800 for each condition).  $P \geq 0.05$ , no statistically significant difference (n.s.); ANOVA Tukey's post hoc test. Scale bar: 100  $\mu$ m (A, H), 50  $\mu$ m (D, F).

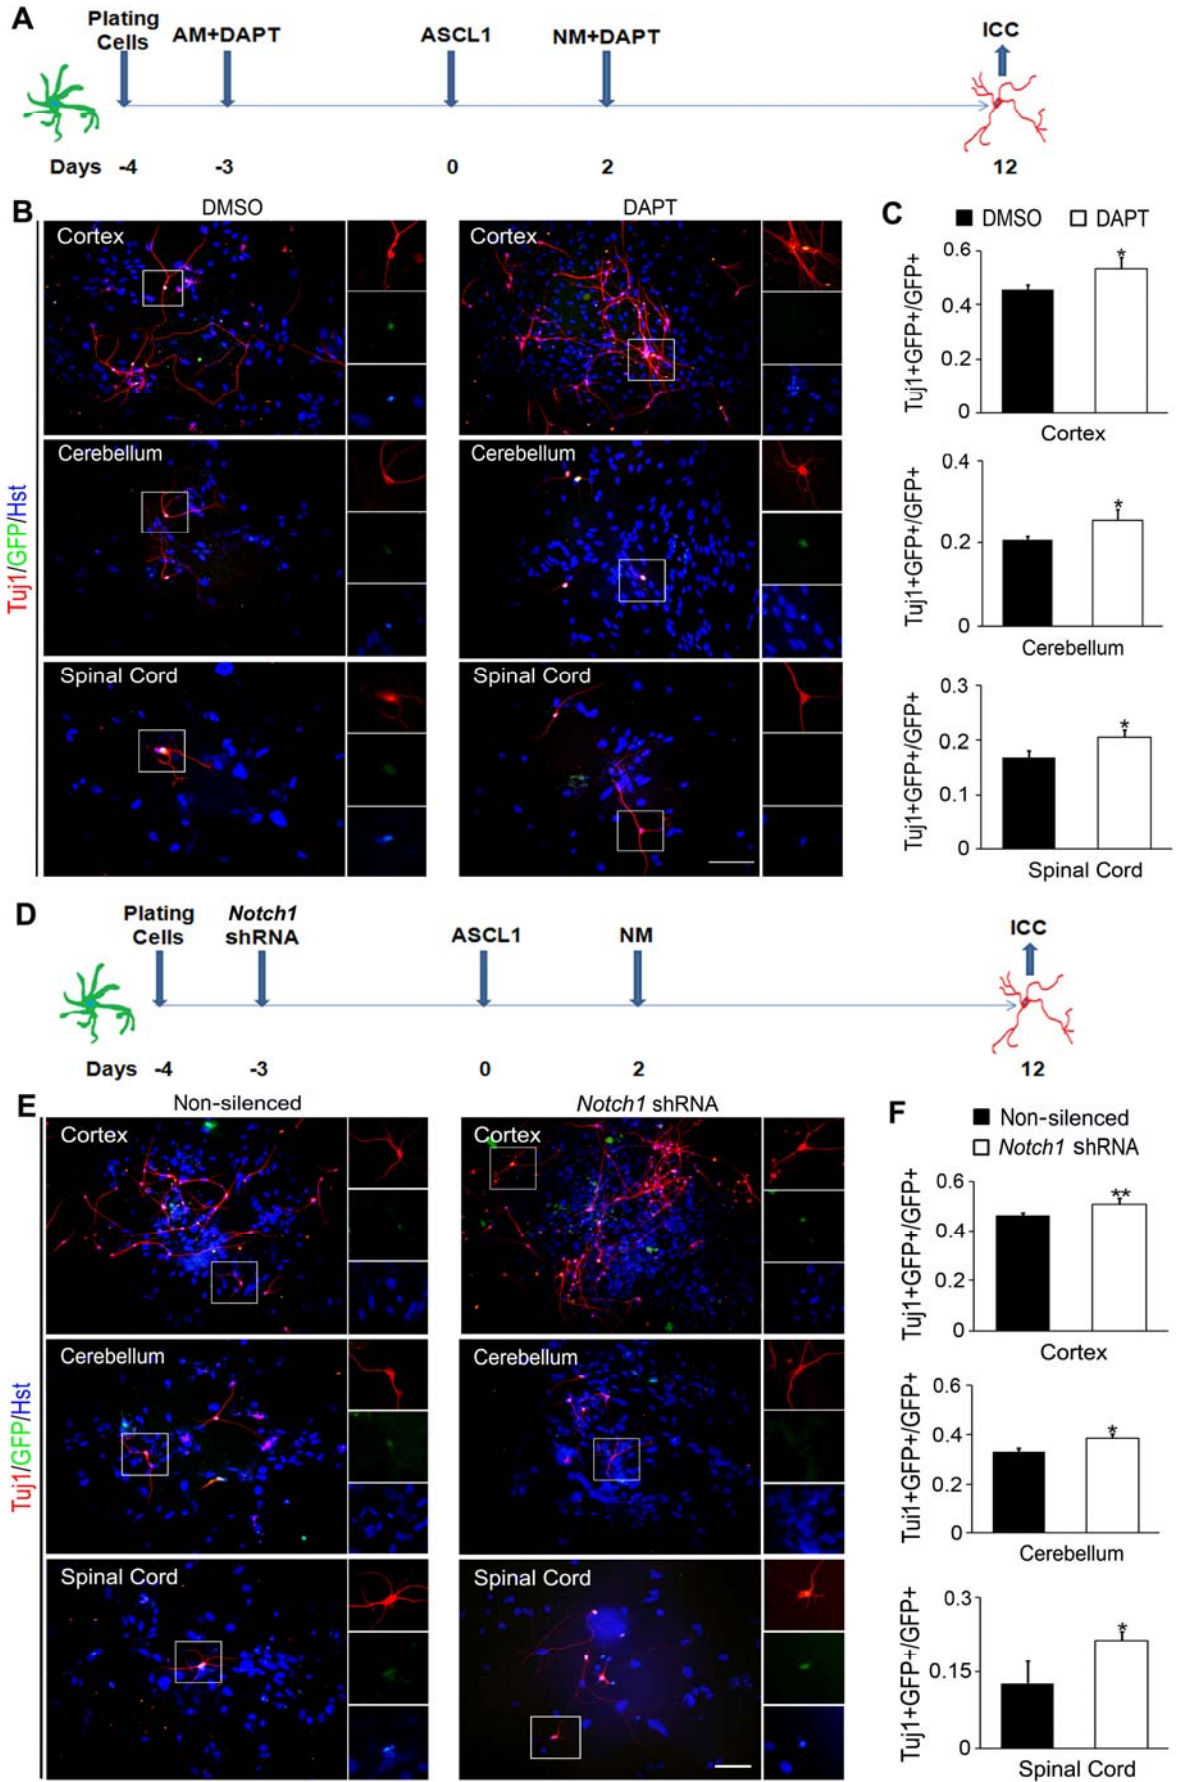

**Figure S6 Effects of blocking NOTCH1 signaling on ASCL1-mediated neuronal reprogramming. (A-C)** DAPT treatment increased the efficiency of ASCL1-induced neuronal reprogramming from postnatal astrocytes. (A) Experimental scheme of blocking NOTCH1 signaling in astrocytes by DAPT during neuronal reprogramming. (B) Representative pictures of ASCL1-induced neurons from postnatal astrocytes through staining with Tuj1 at 12dpi. (C) The efficiency of ASCL1-induced neuronal reprogramming in DAPT group compared with control group (n = 3; cells = 900-1,500 for each condition). \* $P < 0.05$  by ANOVA Tukey's post hoc test. **(D-F)** Interference of Notch1 signaling in astrocytes increased ASCL1-induced neuronal reprogramming efficiency. (D) Experimental scheme of *Notch1* knock-down in astrocytes by lentivirus-mediated shRNA during neuronal reprogramming. (E) Representative pictures of ASCL1-induced neurons from postnatal astrocytes by staining with Tuj1 at 12dpi. (F) The efficiency of ASCL1-induced neuronal reprogramming in *Notch1* shRNA group compared with control group (n = 3; cells = 900-1,600 for each condition). \* $P < 0.05$ , \*\* $P < 0.01$  by ANOVA Tukey's post hoc test. Scale bar = 100  $\mu\text{m}$ .



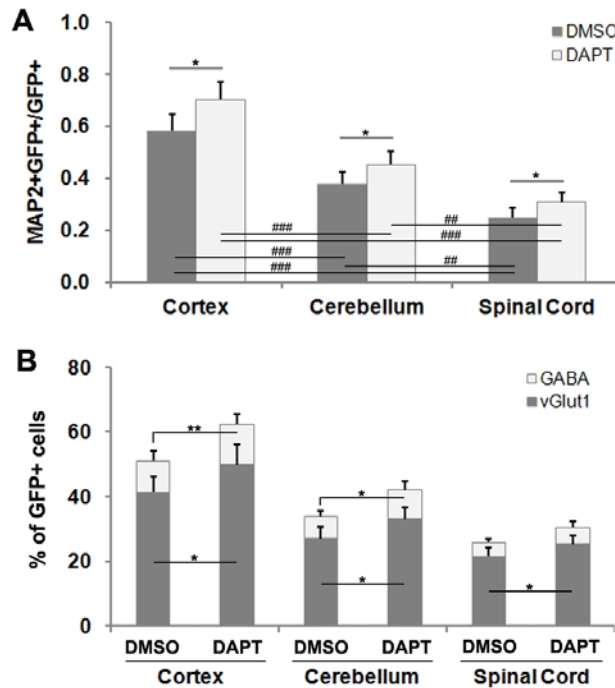

**Figure S7 DAPT treatment did not affect the maturation and cell subtype of NGN2-induced neurons from postnatal astrocytes.** (A) After treated with DMSO or DAPT, quantitative analysis of mature neurons induced from different region-derived postnatal astrocytes was performed at 18 dpi ( $n = 3$ ; cells = 800-1,200 for each condition). Although DAPT treatment resulted in an increase in the induced MAP2-positive mature neurons, just as the distinct reprogramming efficiency observed in astrocytes cultured from cortex, cerebellum and spinal cord, the ratio of MAP2-positive neurons was still highest in cortex group and lowest in spinal cord group, suggesting that the maturation of induced neurons was not affected by DAPT treatment. (B) Neuronal subtype was analyzed at 18 dpi ( $n = 3$ ; cells = 300-600 for each condition). DAPT treatment resulted in an increase in both vGlut1<sup>+</sup> and GABA<sup>+</sup> neurons, while astrocytes derived from cortex, cerebellum and spinal cord were all still mainly reprogrammed into vGlut1<sup>+</sup> neurons, suggesting that the specification of induced neurons was not affected by DAPT treatment. \* $P < 0.05$ , \*\* $P < 0.01$  by Student's t test; ### $P < 0.01$ , #### $P < 0.001$  by ANOVA Tukey's post hoc test.

**Table S1 Gene primer sequences for quantitative real-time PCR**

| <b>Gene</b>     | <b>Primer sequence (5'-3')</b>                                                |
|-----------------|-------------------------------------------------------------------------------|
| <i>Gfap</i>     | sense: GAAACCAACCTGAGGCTGGA<br>antisense: CCACATCCATCTCCACGTGG                |
| <i>Aldoc</i>    | sense: CGGAGACCATGACCTCAAAC<br>antisense: GGTCACTCAGGGCCTTGTAT                |
| <i>Aldh111</i>  | sense: CCAGCCTCCCAGTTCTTCAA<br>antisense: GGACATTGGGCAGAATTTCGC               |
| <i>CD44</i>     | sense: TCTGCCAGGCTTTCAACAGT<br>antisense: CTGCACAGATAGCGTTGGGA                |
| <i>Glast</i>    | sense: CTCACGGTCACTGCTGTCAT<br>antisense: TCCTCATGAGAAGCTCCCCA                |
| <i>Glt-1</i>    | sense: ATCACTGCTCTGGGAACTGC<br>antisense: ACGAATCTGGTACACGCTT                 |
| <i>Vimentin</i> | sense: CCAGAGAGAGGAAGCCGAAA<br>antisense: GGTC AAGACGTGCCAGAGAA               |
| <i>P53</i>      | sense: TCCAGCCTAGAGCCTTCCAA<br>antisense: TCAGGCCCCACTTTCTTGAC                |
| <i>Shh</i>      | sense: AGACCCAACTCCGATGTGTTC<br>antisense: ATATAACCTTGCCTGCCGCTG              |
| <i>Bmp4</i>     | sense: CCCGGAAGCTAGGTGAGTTC<br>antisense: AATCCCATCAGGGACGGAGA                |
| <i>Wnt3a</i>    | sense: CTCGCATGGCATAGATGGGT<br>antisense: ACGTAGCAGCACCAATGGAA                |
| <i>Nrpb1</i>    | sense: ATTGGTGCAGTCAGCATGGA<br>antisense: CCTACAGCTACGACCGCTTT                |
| <i>Etv5</i>     | sense: GAGTGGCCGCTCAGGAGTA<br>antisense: AACCCATCCATGGTGCTTCC                 |
| <i>Notch1</i>   | sense: TGTGGCTTCCTTCTACTGCG<br>antisense: CTTTGCCGTTGACAGGGTTG                |
| <i>Numb</i>     | sense: CAACACTGCTCCATCCCCAT<br>antisense: AATCCCCGGAAAGAGCCTTG                |
| <i>Hes1</i>     | sense: CAGCCAGTGTCAACACGACAC<br>antisense: TCGTTCATGCACTCGCTGAG               |
| <i>Nrarp</i>    | sense: CCTCGCACTTAGGAAGGGAAGGGGACGC<br>antisense: GGACAGCCAGTGACGCTCCAGCACCTC |
| <i>Gapdh</i>    | sense: AAATGGTGAAGGTCGGTGTG<br>antisense: AGGTCAATGAAGGGGTCGTT                |

## **Supplemental Experimental Procedures**

### **ROS level detection**

The CellROX Oxidative Stress Reagent (Cat: C10448, Molecular probes) were used to measure the ROS levels of region-restrict astrocytes, in which the green fluorescence and nuclear localization were acquired via DNA binding upon oxidation (Gascon et al. 2016). Postnatal astrocytes were cultured in 24-well plates with coverslips. The CellROX Reagent was added into the cultured medium at a final concentration of 5  $\mu$ M. The green signal was analyzed within 24 hours.

### **Detection of lipid peroxidation**

The Click-iT Lipid peroxidation Kit based on linoleamide alkyne (LAA) reagent (Cat: C10446, Life technologies) was used to detect the lipid peroxidation of region-restrict astrocytes (Gascon et al. 2016). The cells were labeled according to the specifications described in the product data sheet. After fixed with 4% PFA, the direct fluorescence of the reporters was detected with an Olympus fluorescence microscope.

### **ATP level measurement**

ATP Assay Kit (Cat: S0026, Beyotime) was used to measure the ATP levels of region-restrict astrocytes (Wang et al. 2007). Briefly, astrocytes cultured in 12-well plates were lysed with 100  $\mu$ l Lysis buffer for each well, and the lysate were then centrifuged by 12000g for 5min, finally producing the supernatant liquor for next investigation. To prepare for the measurement of ATP standard curve, the standard solution in the kit was diluted into several reference samples with different concentration in the following: (0, 0,03  $\mu$ M, 0.1  $\mu$ M, 0.3  $\mu$ M, 1  $\mu$ M, 3  $\mu$ M). 100  $\mu$ l ATP test reagent was added into every 1.5 ml-tube, waiting for 5min RT to consume the ATP in background, and then the cell lysate or reference samples was added into each tube. After full mixing, the RLU value of each sample was measured using the luminometer (GLOMAX E5311) and plot the standard curve for calculating the ATP value.

## Supplemental References

- Gascon S, Murenu E, Masserdotti G, Ortega F, Russo GL, Petrik D, Deshpande A, Heinrich C, Karow M, Robertson SP and others. 2016. Identification and Successful Negotiation of a Metabolic Checkpoint in Direct Neuronal Reprogramming. *Cell Stem Cell* 18(3):396-409.
- Wang YM, Pu P, Le WD. 2007. ATP depletion is the major cause of MPP+ induced dopamine neuronal death and worm lethality in alpha-synuclein transgenic *C. elegans*. *Neurosci Bull* 23(6):329-35.
